# Supplementary material
Source: PubMed Central journal article supplement (PMC6856322)

Fig. S1 distribution of supernatant-pellet ratios for Mmc-95010 MS/MS results

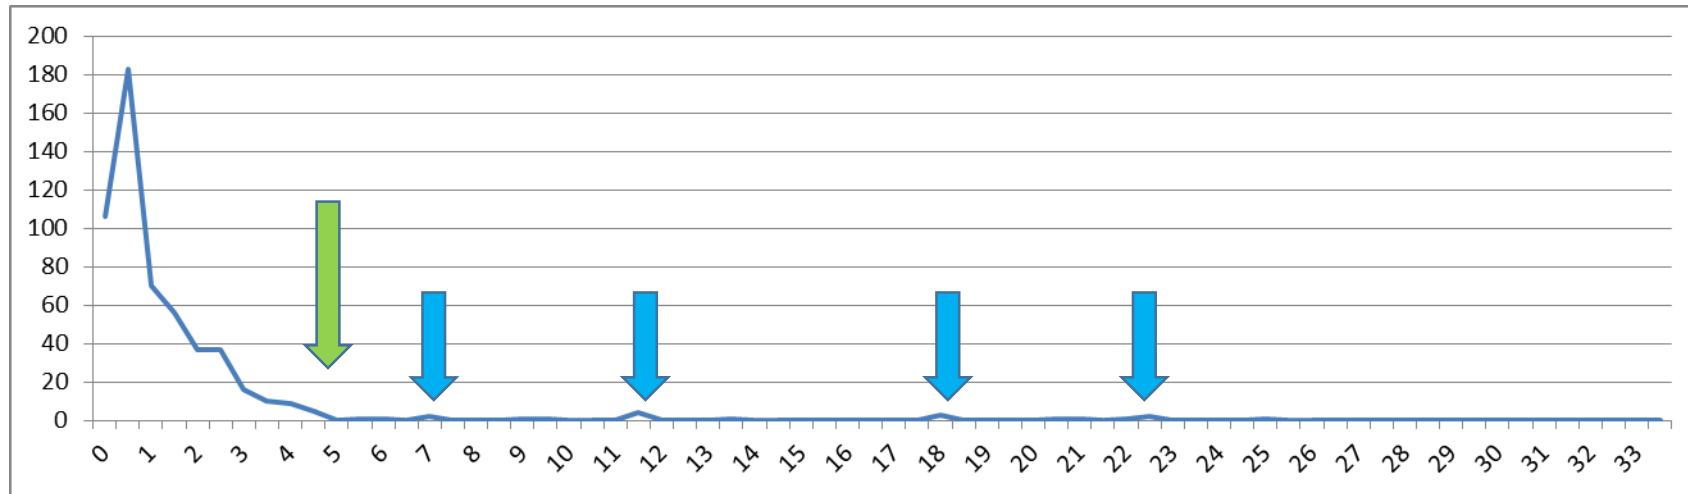

**Legend:** The fold-change value between supernatant and pellet was first calculated for each of the proteins that were detected by tandem mass spectrometry (relative frequency in supernatant/relative frequency in pellet). All values were then analysed by a frequency distribution for values ranging from 0 to 33 and 0,5 intervalls (X axis). Values over 33 were not included. A modified value of 1 was substituted to 0 when no spectral counts were detected in the pellet. The Y axis shows the number of proteins within the 0,5 intervalls.

The curve shows a negative exponential shape for values above 1 (proteins detected more frequently in the supernatant). The green arrow represents the limit for outliers, here 5. Blue arrows pinpoint outlier proteins.

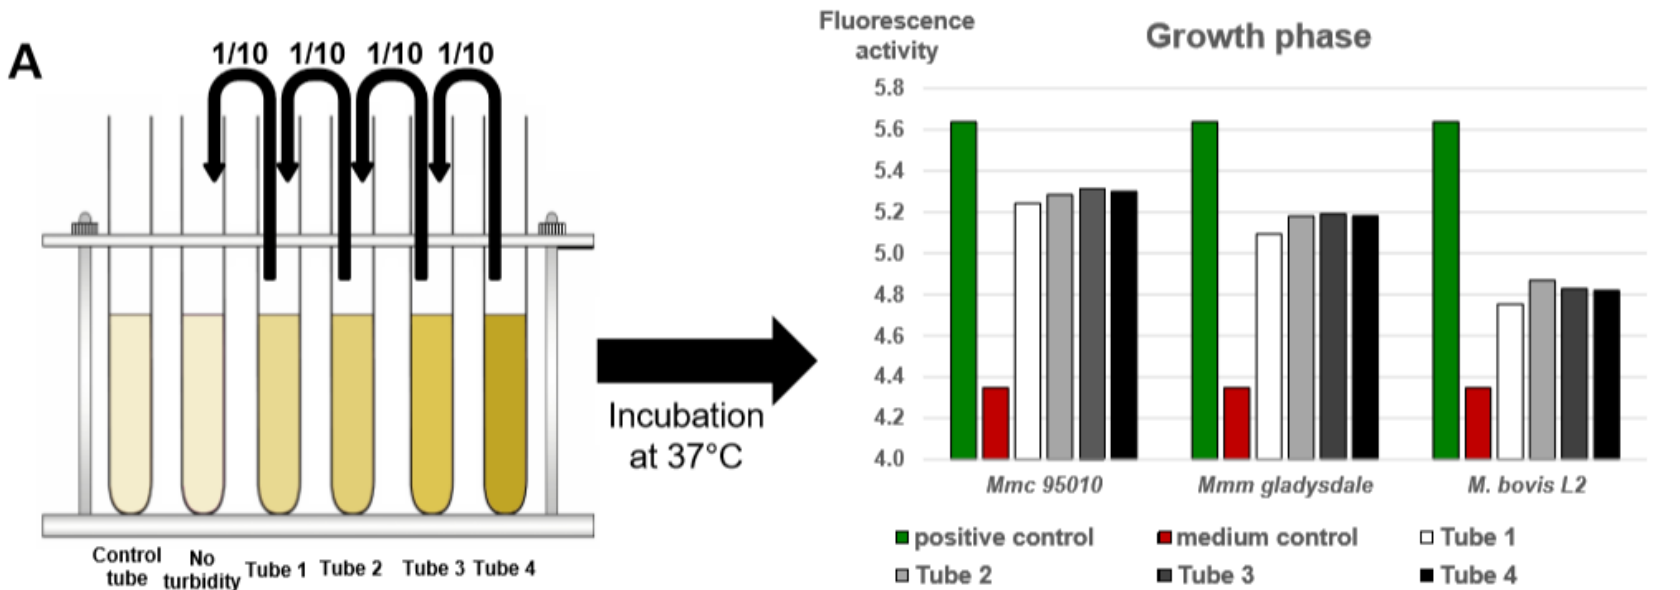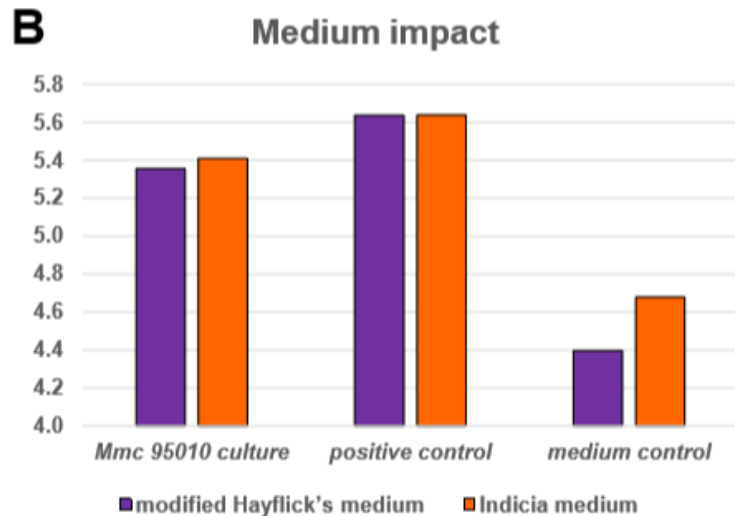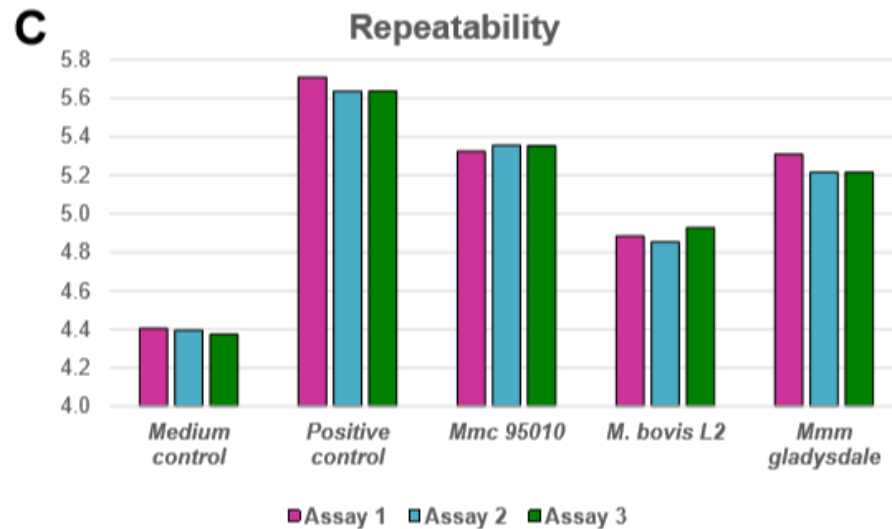

Fig. S2

**Title:** caseinolytic activity measurement robustness evaluation

**Legend:** Caseinolytic activity was assessed on whole cultures of *Mmc* (strain 95010), *Mmm* (strain Gladysdale) and *M. bovis* (strain L2) in modified Hayflick's medium. Each strain was seeded in tenfold dilutions series and incubated until observation of four dilutions showing growth, as evidenced by turbidity of the medium. Tube 1 was the first of the series showing a faint turbidity. The caseinolytic activity of the four cultures were measured and compared with the positive control of the kit and the negative control consisting of a non-seeded medium. Results showed that the caseinolytic activity was stable whatever the length of incubation (A). The possible impact of medium composition was evaluated by comparing the caseinolytic activity of strain *Mmc*-95010 in two media, the modified Hayflick medium and the Indicia medium (B). There was no significant difference of activity between the two media although modified Hayflick medium yielded a lower background value. Finally, the robustness of the method was evaluated by repeating the measurements on three strains having various caseinolytic activities on three different occasions (C). Results showed that the values obtained were very consistent from one day to another.

**Table S1. :** Predicted protease coding genes, expression and foldchange within supernatant and pellet fractions.

**A:** comparisons within *M. capricolum* (Ck, Ck-mut and Mccp-Abomsa); **B:** comparisons within *M. mycoides* (Mmc 95010, Mmm-Rita and Mmm Rita-mut); **C:** *M. bovirhinis* MV5

The proteins for which a significant number of specific peptides were detected, either in the pellet or supernatant (ratio X 10000>10) have their mnemonics highlighted blue. Foldchanges that are significant are highlighted green. Values in a sample that differ significantly (>3 or <1/3) from the closest related sample are highlighted orange. For example, the S41 protease ABC01466.1 is detected almost exclusively in the supernatant of Mcc-Ck strain while it is no more detected in Ck-mut.

**A**

| Protein    | Ck                          |                                 |            | Mnemonic  | gene name | Annotation (MEROPS and MAGE)                            | Ck-mut                      |                                 |            | Mccp-Abomsa |                             |                                 | Mnemonic |            |             |
|------------|-----------------------------|---------------------------------|------------|-----------|-----------|---------------------------------------------------------|-----------------------------|---------------------------------|------------|-------------|-----------------------------|---------------------------------|----------|------------|-------------|
|            | Pellet ratio x10000 (30719) | Supernatant ratio x10000 (8005) | foldchange |           |           |                                                         | Pellet ratio x10000 (31885) | Supernatant ratio x10000 (7323) | foldchange | Protein     | Pellet ratio x10000 (28163) | Supernatant ratio x10000 (9607) |          | foldchange |             |
| ABC01758.1 | 80.0                        | 20.0                            | 0.25       | MCAP_0017 | ftsH      | FtsH-2 peptidase                                        | 83.4                        | 42.3                            | 0.5        |             |                             |                                 |          |            |             |
| ABC01080.1 | 4.6                         | 12.5                            | 2.74       | MCAP_0093 |           | serotaxin ErbB                                          | 2.8                         | 2.7                             | 0.9        |             | CDZ17807.1                  | 55                              | 40.6     | 0.7        | MCCP01_0017 |
| ABC01332.1 | 2.6                         | 0                               | 0          | MCAP_0127 |           | family S9 unassigned peptidase                          | 0.9                         | 0                               | 0          |             | CDZ17906.1                  | 13                              | 26       | 2          | MCCP01_0116 |
| ABC01602.1 | 44.9                        | 72.5                            | 1.6        | MCAP_0133 | pyrG      | GTP synthetase                                          | 46.7                        | 39                              | 2.1        |             | CDZ17944.1                  | 3.5                             | 0        | 0          | MCCP01_0154 |
| ABC01463.1 | 105.8                       | 252.3                           | 2.4        | MCAP_0157 | pepA1     | family M17 unassigned peptidase                         | 75.2                        | 221.2                           | 2.9        |             | CDZ17950.1                  | 56.8                            | 89.5     | 1.6        | MCCP01_0160 |
| ABC01673.1 | 61.2                        | 107.4                           | 1.76       | MCAP_0193 | pepF      | aliquipeptidase F                                       | 53.3                        | 111.9                           | 2.1        |             | CDZ17976.1                  | 164                             | 199      | 1.2        | MCCP01_0186 |
| ABC01289.1 | 177.1                       | 334.8                           | 2.23       | MCAP_0195 | pepA2     | family M17 unassigned peptidase                         | 118.8                       | 331                             | 2.8        |             | CDZ18015.1                  | 54.6                            | 72.8     | 1.3        | MCCP01_0225 |
| ABC01466.1 | 0.32                        | 117.4                           | 360.7      | MCAP_0240 |           | subfamily S41A non-peptidase hamalaquer                 | 1.5                         | 0                               | 0          |             | CDZ18017.1                  | 85.5                            | 125.9    | 1.5        | MCCP01_0227 |
| ABC01790.1 | 0.32                        | 0                               | 0          | MCAP_0328 |           | subfamily S41A non-peptidase hamalaquer                 | 0.31                        | 0                               | 0          |             | CDZ18087.1                  | 5.6                             | 8.3      | 1.5        | MCCP01_0237 |
| ABC01488.1 | 3.26                        | 13.7                            | 4.22       | MCAP_0329 |           | subfamily S41A non-peptidase hamalaquer                 | 3.1                         | 17.7                            | 5.7        |             | CDZ18190.1                  | 0                               | 0        | 0          | MCCP01_0400 |
| ABC01430.1 | 68.0                        | 184.9                           | 2.71       | MCAP_0341 |           | subfamily M24B unassigned peptidase                     | 47.3                        | 135.2                           | 2.9        |             | CDZ18191.1                  | 5.3                             | 10.4     | 1.9        | MCCP01_0401 |
| ABC01110.1 | 1.3                         | 0                               | 0          | MCAP_0392 |           | Predicted hydrolase                                     | 0.6                         | 2.7                             | 4.3        |             | CDZ18202.1                  | 134                             | 303      | 2.3        | MCCP01_0413 |
| ABC01667.1 | 0                           | 0                               | 0          | MCAP_0394 | lzpA      | family A8 non-peptidase hamalaquer                      | 0                           | 0                               | 0          |             | CDZ18263.1                  | 2.1                             | 2.1      | 1          | MCCP01_0476 |
| ABC01761.1 | 29.3                        | 86.2                            | 2.9        | MCAP_0420 | pepY      | peptidase Y                                             | 32.3                        | 107.8                           | 3.3        |             | CDZ18265.1                  | 0                               | 0        | 0          | MCCP01_0478 |
| ABC01505.1 | 12.0                        | 1.3                             | 0.1        | MCAP_0434 | nagA      | family M38 non-peptidase hamalaquer                     | 8.5                         | 0                               | 0          |             | CDZ18290.1                  | 27.3                            | 70.8     | 2.6        | MCCP01_0503 |
| ABC01615.1 | 11.7                        | 29.9                            | 2.6        | MCAP_0445 |           | family S33 unassigned peptidase, lipase                 | 4.7                         | 12.3                            | 2.6        |             | CDZ18310.1                  | 18.4                            | 5.2      | 0.3        | MCCP01_0523 |
| ABC01873.1 | 2.9                         | 1.2                             | 0.4        | MCAP_0446 |           | family S33 unassigned peptidase, lipase                 | 0.9                         | 0                               | 0          |             | CDZ18314.1                  | 8.5                             | 9.4      | 1          | MCCP01_0527 |
| ABC01314.1 | 29.3                        | 16.2                            | 0.6        | MCAP_0466 | pepO      | family M13 unassigned peptidase                         | 35.7                        | 12.3                            | 0.3        |             | CDZ18315.1                  | 14.9                            | 48.9     | 3.3        | MCCP01_0528 |
| ABC01696.1 | 0                           | 0                               | 0          | MCAP_0509 |           | family C39 unassigned peptidase                         | 0                           | 0                               | 0          |             |                             |                                 |          |            |             |
| ABC01186.1 | 12.4                        | 24.9                            | 2          | MCAP_0510 |           | family C56 non-peptidase hamalaquer                     | 10.6                        | 15                              | 1.4        |             | CDZ18378.1                  | 0                               | 0        | 0          | MCCP01_0531 |
| ABC01709.1 | 41.7                        | 32.5                            | 0.8        | MCAP_0516 | lon       | Lon-A peptidase                                         | 67.4                        | 90.1                            | 1.3        |             | CDZ18379.1                  | 17.4                            | 17.7     | 1          | MCCP01_0532 |
| ABC01533.1 | 0                           | 0                               | 0          | MCAP_0606 |           | family S33 unassigned peptidase                         | 0                           | 0                               | 0          |             | CDZ18387.1                  | 46.1                            | 33.3     | 0.7        | MCCP01_0600 |
| ABC01133.1 | 0                           | 0                               | 0          | MCAP_0638 |           | subfamily C1A unassigned peptidase                      | 0                           | 0                               | 0          |             | CDZ18464.1                  | 0                               | 0        | 0          | MCCP01_0677 |
| ABC01688.1 | 0                           | 0                               | 0          | MCAP_0675 | map       | subfamily M24A unassigned peptidase                     | 3.4                         | 8.2                             | 2.4        |             |                             |                                 |          |            |             |
| ABC01575.1 | 0                           | 0                               | 0          | MCAP_0715 |           | family M79 unassigned peptidase                         | 0                           | 0                               | 0          |             | CDZ18558.1                  | 10.3                            | 26       | 2.5        | MCCP01_0771 |
| ABC01578.1 | 0.3                         | 0                               | 0          | MCAP_0739 |           | family S9 unassigned peptidase                          | 1.2                         | 0                               | 0          |             | CDZ18598.1                  | 1                               | 0        | 0          | MCCP01_0811 |
| ABC01238.1 | 2.3                         | 0                               | 0          | MCAP_0822 |           | family S9 unassigned peptidase                          | 0.9                         | 0                               | 0          |             |                             |                                 |          |            |             |
| ABC01232.1 | 10.4                        | 0                               | 0          | MCAP_0841 | pldB      | family S33 unassigned peptidase                         | 13.1                        | 1.3                             | 0.1        |             | CDZ18722.1                  | 7.4                             | 2.1      | 0.3        | MCCP01_0935 |
| ABC01631.1 | 0                           | 0                               | 0          | MCAP_0046 | pepQ      | Praline dipeptidase                                     | 0                           | 0                               | 0          |             | CDZ18750.1                  | 0                               | 0        | 0          | MCCP01_0968 |
| ABC01450.1 | 0.3                         | 0                               | 0          | MCAP_0072 |           | Putative peptidase DUF31                                | 1.5                         | 0                               | 0          |             | CDZ17841.1                  | 0                               | 0        | 0          | MCCP01_0051 |
| ABC01290.1 | 5.5                         | 0                               | 0          | MCAP_0231 |           | Putative peptidase DUF31                                | 8.5                         | 0                               | 0          |             |                             |                                 |          |            |             |
| ABC01572.1 | 0.3                         | 1.2                             | 3.8        | MCAP_0267 |           | metalloendopeptidase                                    | 1.5                         | 1.4                             | 0.9        |             | CDZ18723.1                  | 0                               | 0        | 0          | MCCP01_0090 |
| ABC01081.1 | 7.8                         | 6.2                             | 0.8        | MCAP_0346 |           | Putative peptidase DUF31; Mycoplasma lqG protease       | 16.3                        | 5.4                             | 0.3        |             | CDZ18538.1                  | 1                               | 0        | 0          | MCCP01_0811 |
| ABC01493.1 | 30.6                        | 20                              | 0.6        | MCAP_0350 |           | Putative peptidase DUF31; Mycoplasma lqG protease       | 27.3                        | 8.2                             | 0.3        |             |                             |                                 |          |            |             |
| ABC01767.1 | 29.6                        | 12.5                            | 0.4        | MCAP_0352 |           | Putative peptidase DUF31; Mycoplasma lqG protease       | 50.2                        | 3.6                             | 0.2        |             | CDZ18166.1                  | 1.4                             | 0        | 0          | MCCP01_0376 |
| ABC01738.1 | 37.7                        | 23.7                            | 0.6        | MCAP_0366 |           | ATP-dependent Clp protease, ATP-binding subunit ClpB    | 43.3                        | 34.1                            | 0.8        |             | CDZ18223.1                  | 46.5                            | 26       | 0.6        | MCCP01_0434 |
| ABC01856.1 | 0                           | 0                               | 0          | MCAP_0413 |           | family C108 unassigned peptidase                        | 0                           | 0                               | 0          |             |                             |                                 |          |            |             |
| ABC01813.1 | 0.3                         | 0                               | 0          | MCAP_0508 |           | Metalloprotease catalytic domain superfamily, predicted | 0.9                         | 0                               | 0          |             | CDZ18239.1                  | 58.9                            | 53       | 0.9        | MCCP01_0450 |
| ABC01224.1 | 6.5                         | 12.5                            | 1.9        | MCAP_0513 |           | Papain-like cysteine peptidase superfamily              | 7.2                         | 15                              | 2          |             | CDZ18281.1                  | 0                               | 0        | 0          | MCCP01_0494 |
| ABC01698.1 | 20.8                        | 46.2                            | 2.2        | MCAP_0514 |           | Papain-like cysteine peptidase superfamily              | 16.9                        | 30                              | 1.8        |             | CDZ18377.1                  | 1.8                             | 2        | 1.2        | MCCP01_0530 |
| ABC01102.1 | 0.3                         | 1.2                             | 3.8        | MCAP_0758 |           | Papain-like cysteine peptidase superfamily              | 0.3                         | 0                               | 0          |             |                             |                                 |          |            |             |
| ABC01766.1 | 0.9                         | 0                               | 0          | MCAP_0804 |           | zinc metalloprotease                                    | 0.3                         | 0                               | 0          |             | CDZ18385.1                  | 8.9                             | 8.3      | 0.9        | MCCP01_0538 |
| ABC01727.1 | 2.9                         | 0                               | 0          | MCAP_0821 |           | Oxialaql caprotoxin endopeptidase                       | 1.6                         | 0                               | 0          |             |                             |                                 |          |            |             |
| ABC01562.1 | 1.3                         | 0                               | 0          | MCAP_0846 |           | Putative peptidase DUF31                                | 6.6                         | 0                               | 0          |             | CDZ18698.1                  | 0                               | 0        | 0          | MCCP01_0911 |
|            |                             |                                 |            |           |           |                                                         |                             |                                 |            |             | CDZ18722.1                  | 7.4                             | 2.1      | 0.3        | MCCP01_0935 |
|            |                             |                                 |            |           |           |                                                         |                             |                                 |            |             | CDZ18743.1                  | 13.1                            | 3.1      | 0.2        | MCCP01_0966 |

B

| Protein    | Mmc 35010 | Mmc 35010 | Mmc 35010 | Macromoi | Gene | Annotation (MEROPS and MAGE)                            | Protein    | Rita    | Rita     | Rita    | Macromoi  | Macromoi | Rita-mut | Rita-mut | Rita-mut |
|------------|-----------|-----------|-----------|----------|------|---------------------------------------------------------|------------|---------|----------|---------|-----------|----------|----------|----------|----------|
|            | ratio     | Supernat  | foldcha   |          |      |                                                         |            | Pellet  | Supernat | foldcha |           |          | Pellet   | Supernat | foldcha  |
|            | x10000    | at ratio  | age       |          |      |                                                         |            | ratio   | ratio    | ratio   |           |          | x10000   | x10000   | age      |
|            | (26893)   | (11964)   |           |          |      |                                                         |            | (29391) |          |         |           |          | (29866)  | (7838)   |          |
| CBW53764.1 | 50        | 2         | 0,0       | MLC_0360 | ftsH | FtsH-2 peptidase                                        | ADK69293.1 | 73      | 46       | 0,6     | MMS_A0039 | MSC_0039 | 70       | 63       | 0,9      |
| CBW53797.1 | 0         | 0         |           | MLC_0630 |      | family S9 unassigned peptidases                         | ADK69778.1 | 0       | 0        | 0,0     | MMS_A0086 | MSC_0082 | 0        | 0        | 0,0      |
| CBW53831.1 | 1         | 1         |           | MLC_1030 |      | subfamily S41A non-peptidase homologues                 | ADK69367.1 | 2       | 0        | 0,0     | MMS_A0112 | MSC_0107 | 9        | 8        | 0,8      |
| CBW53842.1 | 1         | 0         |           | MLC_1140 |      | family S9 unassigned peptidases                         | ADK69533.1 | 2       | 0        | 0,0     | MMS_A0132 | MSC_0116 | 3        | 0        | 0,0      |
| CBW53849.1 | 42        | 14        | 0,3       | MLC_1210 | pyrG | CTP synthetase                                          | ADK70097.1 | 53      | 46       | 0,9     | MMS_A0155 | MSC_0134 | 58       | 69       | 1,2      |
| CBW53854.1 | 4         | 0         | 0,0       | MLC_1260 |      | subfamily S8A unassigned peptidases                     |            |         |          |         |           |          |          |          |          |
| CBW53874.1 | 141       | 317       | 2,2       | MLC_1460 | pepA | family M17 unassigned peptidases                        | ADK69755.1 | 124     | 268      | 2,1     | MMS_A0189 | MSC_0163 | 127      | 259      | 2,0      |
| CBW53913.1 | 56        | 37        | 0,6       | MLC_1850 | pepF | oligopeptidase F                                        | ADK69955.1 | 42      | 45       | 1,0     | MMS_A0268 | MSC_0237 | 43       | 52       | 1,2      |
| CBW53915.1 | 84        | 195       | 2,3       | MLC_1870 | pepA | family M17 unassigned peptidases                        |            |         |          |         | MSC_0235  |          |          |          |          |
| CBW53985.1 | 0         | 397       | 397,0     | MLC_2570 |      | subfamily S41A non-peptidase homologues                 | ADK69439.1 | 0       | 0        | 0,0     | MMS_A0313 | MSC_0281 | 0        | 0        | 0,0      |
| CBW54055.1 | 0         | 38        | 38,4      | MLC_3270 |      | subfamily S41A non-peptidase homologues                 |            |         |          |         | MSC_0343  |          |          |          |          |
| CBW54056.1 | 3         | 53        | 13,2      | MLC_3280 |      | subfamily S41A non-peptidase homologues                 |            |         |          |         | MSC_0345  |          |          |          |          |
| CBW54067.1 | 45        | 165       | 3,6       | MLC_3390 | pepQ | subfamily M24B unassigned peptidases                    | ADK69979.1 | 47      | 136      | 2,8     | MMS_A0393 | MSC_0357 | 40       | 85       | 2,1      |
| CBW54074.1 | 0         | 0         |           | MLC_3460 |      | subfamily C1A unassigned peptidases                     |            |         |          |         |           |          |          |          |          |
| CBW54082.1 | 0         | 2         |           | MLC_3540 | lip1 | family S33 unassigned peptidases                        | ADK69331.1 | 0       | 0        | 0,0     | MMS_A0406 | MSC_0368 | 0        | 0        | 0,0      |
| CBW54162.1 | 49        | 16        | 0,3       | MLC_4340 | lon  | Lon-A peptidase                                         | ADK69133.1 | 38      | 13       | 0,3     | MMS_A0504 | MSC_0454 | 42       | 26       | 0,6      |
| CBW54168.1 | 5         | 16        | 2,7       | MLC_4400 |      | family C56 non-peptidase homologues                     | ADK69820.1 | 2       | 0        | 0,0     | MMS_A0508 | MSC_0458 | 4        | 1        | 0,3      |
| CBW54169.1 | 0         | 0         |           | MLC_4410 | abc  | family C39 unassigned peptidases                        |            |         |          |         | MSC_0459  |          |          |          |          |
| CBW54212.1 | 40        | 18        | 0,5       | MLC_4840 | pepD | family M13 unassigned peptidases                        |            |         |          |         | MSC_0504  |          |          |          |          |
| CBW54233.1 | 50        | 29        | 0,6       | MLC_5050 | lip2 | family S33 unassigned peptidases                        | ADK69239.1 | 26      | 13       | 0,5     | MMS_A0582 | MSC_0530 | 25       | 20       | 0,8      |
| CBW54234.1 | 15        | 0         | 0,0       | MLC_5060 | lip2 | family S33 unassigned peptidases                        |            |         |          |         |           |          |          |          |          |
| CBW54235.1 | 14        | 16        | 1,1       | MLC_5070 | lip3 | family S33 unassigned peptidases                        | ADK69648.1 | 1       | 0        | 0,0     | MMS_A0583 | MSC_0531 | 1        | 0        | 0,0      |
| CBW54242.1 | 12        | 3         | 0,2       | MLC_5140 | nagA | family M38 non-peptidase homologues                     | ADK70009.1 | 13      | 0        | 0,0     | MMS_A0585 | MSC_0533 | 13       | 4        | 0,3      |
| CBW54257.1 | 0         | 0         |           | MLC_5230 |      | subfamily C1A unassigned peptidases                     | ADK69950.1 | 0       | 0        | 0,0     | MMS_A0602 | MSC_0550 | 0        | 0        | 0,0      |
| CBW54260.1 | 35        | 66        | 1,8       | MLC_5320 | pepV | peptidase V                                             | ADK69226.1 | 37      | 69       | 1,8     | MMS_A0606 | MSC_0554 | 32       | 74       | 2,3      |
| CBW54267.1 | 0         | 0         |           | MLC_5390 |      | family C108 unassigned peptidases                       | ADK69253.1 | 0       | 0        | 0,0     | MMS_A0613 | MSC_0561 | 0        | 0        | 0,0      |
| CBW54280.1 | 0         | 0         |           | MLC_5520 | ispA | family A8 non-peptidase homologues                      | ADK69628.1 | 0       | 0        | 0,0     | MMS_A0642 | MSC_0584 | 0        | 0        | 0,0      |
| CBW54282.1 | 1         | 0         |           | MLC_5540 | pepD | subfamily S9C unassigned peptidases                     | ADK69713.1 | 0       | 0        | 0,0     | MMS_A0644 | MSC_0586 | 0        | 0        | 0,0      |
| CBW54326.1 | 2         | 0         |           | MLC_5980 |      | subfamily S8A unassigned peptidases                     |            |         |          |         |           |          |          |          |          |
| CBW54404.1 | 6         | 21        | 2,9       | MLC_6750 | map  | subfamily M24A unassigned peptidases                    | ADK69880.1 | 8       | 13       | 1,5     | MMS_A0795 | MSC_0724 | 9        | 18       | 1,7      |
| CBW54445.1 | 0         | 0         |           | MLC_7150 |      | family M79 unassigned peptidases                        | ADK70111.1 | 0       | 0        | 0,0     | MMS_A0841 | MSC_0767 | 0        | 0        | 0,0      |
| CBW54490.1 | 7         | 0         | 0,0       | MLC_7600 | pidB | family S33 unassigned peptidases                        | ADK69837.1 | 21      | 0        | 0,0     | MMS_A0919 | MSC_0837 | 19       | 1        | 0,1      |
| CBW54520.1 | 6         | 14        | 1,9       | MLC_7900 |      | esterase EstB                                           |            |         |          |         | MSC_0861  |          |          |          |          |
| CBW54631.1 | 0         | 0         |           | MLC_9010 |      | subfamily M23B non-peptidase homologues                 |            |         |          |         |           |          |          |          |          |
| CBW54632.1 | 0         | 1         |           | MLC_9020 |      | subfamily M23B non-peptidase homologues                 |            |         |          |         |           |          |          |          |          |
| CBW54642.1 | 3         | 0         | 0,0       | MLC_9120 |      | subfamily S8A unassigned peptidases                     | ADK70002.1 | 15      | 0        | 0,0     | MMS_A1133 | MSC_1061 | 20       | 11       | 0,6      |
| CBW53777.1 | 22        | 29        | 1,3       | MLC_0490 |      | Putative peptidase DUF31                                | ADK69751.1 | 0       | 0        | 0,0     | MMS_A0054 | MSC_0052 | 0        | 0        | 0,0      |
| CBW53798.1 | 3         | 0         | 0,0       | MLC_0700 |      | Oriallycaprotein endopeptidase                          | ADK69037.1 | 4       | 0        | 0,0     | MMS_A0087 | MSC_0083 | 4        | 1        | 0,2      |
| CBW53816.1 | 0         | 0         |           | MLC_0880 | pepQ | Proline dipeptidase                                     | ADK69817.1 | 0       | 0        | 0,0     | MMS_A0094 | MSC_0090 | 0        | 0        | 0,0      |
| CBW53878.1 | 0         | 0         |           | MLC_1500 |      | Papain-like cysteine peptidases superfamily             |            |         |          |         | MSC_0170  |          |          |          |          |
| CBW53944.1 | 2         | 1         |           | MLC_2160 |      | Peptidase_M78                                           |            |         |          |         |           |          |          |          |          |
| CBW53958.1 | 3         | 3         | 0,8       | MLC_2300 |      | Inactive homolog of metal-dependent proteases           | ADK70014.1 | 2       | 0        | 0,0     | MMS_A0343 | MSC_0312 | 1        | 1        | 0,6      |
| CBW53994.1 | 1         | 10        | 5,8       | MLC_2660 |      | Putative peptidase DUF31                                | ADK69165.1 | 1       | 0        | 0,0     | MMS_A0304 | MSC_0271 | 14       | 24       | 1,6      |
| CBW54029.1 | 0         | 0         |           | MLC_3010 |      | Peptidase_M78                                           |            |         |          |         |           |          |          |          |          |
| CBW54081.1 | 1         | 8         | 4,8       | MLC_3530 |      | Papain-like cysteine peptidases superfamily             |            |         |          |         |           |          |          |          |          |
| CBW54164.1 | 1         | 1         |           | MLC_4360 |      | Papain-like cysteine peptidases superfamily             |            |         |          |         |           |          |          |          |          |
| CBW54165.1 | 12        | 12        | 0,9       | MLC_4370 |      | Papain-like cysteine peptidases superfamily             |            |         |          |         |           |          |          |          |          |
| CBW54170.1 | 1         | 0         |           | MLC_4420 |      | Metalloprotease catalytic domain superfamily, predicted | ADK69668.1 | 1       | 0        | 0,0     | MMS_A0511 | MSC_0461 | 0        | 0        | 0,0      |
| CBW54304.1 | 30        | 10        | 0,3       | MLC_5760 | clpB | ATP dependent Clp protease ATP binding subunit          | ADK69129.1 | 44      | 24       | 0,5     | MMS_A0674 | MSC_0613 | 44       | 37       | 0,8      |
| CBW54318.1 | 13        | 11        | 0,8       | MLC_5900 |      | Putative peptidase DUF31; Mycoplasma IgG protease       | ADK69475.1 | 59      | 56       | 0,9     | MMS_A0686 | MSC_0625 | 71       | 110      | 1,5      |
| CBW54320.1 | 18        | 44        | 2,4       | MLC_5920 |      | Putative peptidase DUF31; Mycoplasma IgG protease       | ADK69746.1 | 44      | 45       | 1,0     | MMS_A0688 | MSC_0627 | 52       | 66       | 1,2      |
| CBW54322.1 | 4         | 0         | 0,0       | MLC_5940 |      | Putative peptidase DUF31; Mycoplasma IgG protease       | ADK69723.1 | 19      | 28       | 1,4     | MMS_A0696 | MSC_0635 | 30       | 57       | 1,8      |
| CBW54324.1 | 7         | 14        | 1,8       | MLC_5960 |      | Putative peptidase DUF31; Mycoplasma IgG protease       |            |         |          |         |           |          |          |          |          |
| CBW54539.1 | 1         | 1         |           | MLC_8090 |      | Putative peptidase DUF31                                | ADK69542.1 | 0       | 0        |         | MMS_A0983 | MSC_0897 | 2        | 0        | 0,0      |
| CBW54606.1 | 0         | 0         |           | MLC_8760 |      | zinc metalloprotease                                    | ADK69190.1 | 0       | 0        |         | MMS_A1002 | MSC_0915 | 0        | 0        | 0,0      |

C

**Predicted protease coding genes and tandem mass spectrometry detection of proteases for *M. borviridis* (strain MV5)**

| Protein    | ratio                 |                  | foldchange | Mnemonic      | gene name    | Annotation                                   |
|------------|-----------------------|------------------|------------|---------------|--------------|----------------------------------------------|
|            | supernatant<br>x10000 | pellet<br>x10000 |            |               |              |                                              |
| BBA22062.1 | 33                    | 0                | 0          | MBVR14_L_0    | pepF         | PepF Oligoendopeptidase F                    |
| BBA22075.1 | 71                    | 60               | 1          | MBVR14_L_0    | pepO         | PepO Predicted metalloendopeptidase          |
| BBA22077.1 | 0                     | 0                |            | MBVR14_L_0    | lepB         | LepB Signal peptidase I                      |
| BBA22091.1 | 0                     | 0                |            | MBVR14_L_0    | lspA         | LspA lipoprotein signal peptidase            |
| BBA22105.1 | 0                     | 0                |            | MBVR14_L_0    | map          | Map Methionine aminopeptidase                |
|            |                       |                  |            | MBVR14_L_0180 |              | Peptidase_S8 Subtilase family                |
| BBA22164.1 | 104                   | 246              | 2          | MBVR14_L_0    | pepB (pepB)  | PepB Leucyl aminopeptidase                   |
|            |                       |                  |            | MBVR14_L_0214 |              | Peptidase S8 family domain                   |
| BBA22185.1 | 94                    | 326              | 10         | MBVR14_L_0224 |              | DUF31 Putative peptidase                     |
| BBA22211.1 | 34                    | 299              | 9          | MBVR14_L_0284 |              | DUF31 Putative peptidase                     |
|            |                       |                  |            | MBVR14_L_0377 |              | DUF31 Putative peptidase                     |
| BBA22270.1 | 24                    | 155              | 6          | MBVR14_L_0378 |              | DUF31 Putative peptidase                     |
| BBA22288.1 | 3                     | 0                | 0          | MBVR14_L_0403 |              | proline iminopeptidase                       |
| BBA22289.1 | 42                    | 30               | 1          | MBVR14_L_0404 |              | peptidase M24 family protein                 |
|            |                       |                  |            | MBVR14_L_0407 |              | DUF31 Putative peptidase                     |
| BBA22293.1 | 1                     | 6                | 3          | MBVR14_L_0414 |              | proline dipeptidase                          |
| BBA22294.1 | 30                    | 26               | 1          | MBVR14_L_0    | pepB (pepB)  | PepB Leucyl aminopeptidase                   |
| BBA22400.1 | 22                    | 45               | 2          | MBVR14_L_0605 |              | FrvX Putative aminopeptidase                 |
| BBA22412.1 | 0                     | 0                |            | MBVR14_L_0625 |              | N-terminal double-glycine peptidase domain   |
|            |                       |                  |            | MBVR14_L_0683 |              | Peptidase S8 family domain                   |
|            |                       |                  |            | MBVR14_L_0723 |              | Putative aminopeptidase FrvX                 |
| BBA22489.1 | 31                    | 448              | 5          | MBVR14_L_0756 |              | DUF31 Putative peptidase                     |
| BBA22490.1 |                       |                  |            | MBVR14_L_0760 |              | DUF31 Putative peptidase                     |
| BBA22491.1 | 3                     | 123              | 33         | MBVR14_L_0761 |              | DUF31 Putative peptidase                     |
| BBA22507.1 | 5                     | 0                | 0          | MBVR14_L_0794 |              | FrvX Putative aminopeptidase                 |
| BBA22542.1 | 2                     | 118              | 38         | MBVR14_L_0853 |              | DUF31 Putative peptidase                     |
| BBA22552.1 | 76                    | 4                | 0          | MBVR14_L_0    | lon          | ATP-dependent Lon protease                   |
| BBA22557.1 | 0                     | 4                | 4          | MBVR14_L_0875 |              | Peptidase S8 family domain                   |
| BBA22600.1 | 0                     | 0                |            | MBVR14_L_0    | clp          | ATP-dependent protease ClpP                  |
| BBA22067.1 | 0                     | 0                |            | MBVR14_L_0020 |              | AprE Serine protease                         |
| BBA22069.1 | 1                     | 0                |            | MBVR14_L_0022 |              | AprE Serine protease                         |
|            |                       |                  |            | MBVR14_L_0090 |              | AprE Serine protease                         |
| BBA22231.1 | 7                     | 0                | 0          | MBVR14_L_0314 |              | ThiJ Putative intracellular protease/amidase |
| BBA22246.1 | 63                    | 2                | 0          | MBVR14_L_0    | ftsH         | HflB ATP-dependent Zn proteases              |
| BBA22300.1 | 0                     | 0                |            | MBVR14_L_0432 |              | serine protease                              |
| BBA22308.1 | 1                     | 2                |            | MBVR14_L_0445 |              | AprE Serine protease                         |
|            |                       |                  |            | MBVR14_L_0687 |              | AprE Serine protease                         |
| BBA22467.1 | 14                    | 4                | 0          | MBVR14_L_0707 |              | AprE Serine protease                         |
| BBA22541.1 | 57                    | 317              | 5          | MBVR14_L_0    | ftsN* (pape) | FtsN Cell division protein                   |

The mnemonics highlighted in blue correspond to proteins which are detected by mass spectrometry (>4 spectral counts)

The proteins highlighted in green are those which proportion is significantly higher in the supernatant than in the cell pellet.

Protease coding genes were data-mined from the MV5 genome annotation.

An estimation of the protein ratio in the sample, pellet or supernatant, was calculated by dividing the number of specific spectral counts for this protein by the total number of spectral counts for the sample. These proportions were compared by calculating a foldchange value (supernatant/pellet). Proteins which are consistently detected (ratio X 10000>10) have their mnemonic highlighted blue. Proteins which are significantly more detected in the supernatant are highlighted in green. For strain MV5, four DUF31 putative peptidases were the only proteases that were significantly overrepresented in the supernatant.

## Supl. Material

This Material shows the BLASTP results obtained either with the full MLC\_2570 peptidic sequence through the MAGE interface against various mycoplasma genomes or the BLASTP results obtained when using the conserved peptidase S41 superfamily domain and interrogating the nr NCBI database excluding mycoplasma sequences.

For each sequence an alignment is shown, followed by the protein full sequence with the main characteristics highlighted (N-terminal signal sequence, C-terminal transmembrane sequence, active site of the serine protease and eventually LPXTG sortase domain, for *Ruminococcus* sequences) as well as the TMHMM results.

The N-terminal signal sequence is highlighted in blue when ending with a C and potentially a predicted lipoprotein.

### Query

```
>MLC_2570|ID:18101481| transmembrane protein and tail
specific protease [Mycoplasma mycoides subsp. capri LC
95010]
MKLVKKIGFLSLSAISILGPLAMINNLTTDNNLLITKRFLSSSNSNVGLKSYDYINLINN
KYIPAKINLHDHNGIAYIGVKEFLNSLDGLISFSKIKVRPYQANFYKEKEISYNYKDNK
VVLNSISKYSNNKTTNYQLEIDSKNKTITVSDNDFFTDIFTFYRGEEDLNIDFLNTEI
VNKNKHIVFDLNKYGIEILNDQNDLYLPLVLINQLFLNQSNVQLYFNGQSVNLFAYSKTL
GKVELLKQLKHSYLNQNHIPAGLKDFQYKYLGFDFDHFYGIKLDKNASYKDLFKKYEKY
IKADNTTHYLTSRYLIEQLDDLHSSYLLTGYYNKDLETINKAVLKTTTPRSDFKDIARR
LSAYYDKELNYKNVYTPDRITSVISFKNFEANSAPFKIEESLQAQRDGIKNIVLDVSFNS
GGYLGTAFEIMGFLTDKPFKSYSYNPLTKEQKVETIKSRFKKYDFNYVLTSPFSFSAGN
IFPQLVKDNNVAKVIGFKTAGGASAISQAILFTGDIQLSSNNVLTNKSHQSLEYGVNPD
ITLGFDPFKQTEKFFASAYIQQAINKDTNTLNSIPATHSSVIEPNYVHELVEQPQPLQLS
RKTDETEIKNLNNLFSSIKETERKDAYFVLGALGVVISLAISFVIIKLLK*
```

In red, the peptides detected by tandem massspectrometry from the supernatant sample

**S** : active site of the serine protease

Grey: N-terminal transmembrane segment with a Signal Peptidase I domain

Yellow: C-terminal transmembrane segment

Green: peptidase S41 superfamily

*M. agalactiae*

**Q** - 1 - **MAG\_5760** [Mycoplasma agalactiae PG2 chromosome NC\_009497]  
hypothetical protein | automatic/finished

Length=643

Score = 212 bits (539), Expect = 1e-66  
Identities = 102/154 (66%), Positives = 127/154 (82%), Gaps = 0/154 (0%)

```

Query 1 TSVISFKNFANSFAFKIEESLKQAQRDGIKNIIVLDVFSNNGYLGTAFEMGFLTDKPFK 60
      TSVISFK FE NSA IE+SL +A+ GIKNI+ +V+ N GGY+G A+EIMGFL+DKPF
Sbjct 357 TSVISFKAFEENSAVSIKSLNEAKEKGIKNIIFNVTHNGGGYIGAAAYEIMGFLSDKPFN 416

Query 61 SYSYNPLTKQKQVETIKSRFKKYDFNYVLTSPFSFAGNIFPQLVKDNNVAKVIGFKTA 120
      +++NPLT E K+ETIKS+ KYDFNY+VLT+PFSSAGNIFPQLV+DNN+ K+IG+ T
Sbjct 417 VVWTHNPLTGENKIETIKSKKTKYDFNYFVLTAPFSFAGNIFPQLVRDNNLTKIIGYDTF 476

Query 121 GGASAIQAILPTGDIIQLSSNNVLTNKSHQSLE 154
      GG+SAI ILPTGDIIQLSSN V T+K+ ++ E
Sbjct 477 GGSSAIGYYILPTGDIIQLSSNTVFTDKNFKTTE 510

```

```

>MAG_5760|ID:18180474| hypothetical protein [Mycoplasma agalactiae PG2]
MKLKKLKHIFLASCVTAPFIGLSAIVNNSNDEISSKLNEFDLIPLAKELNRQPKNKKVK
MYMHNVPYIGIKEFLDAVSKI VKNENIEYSFDVKKVLTLYKTDEGKNSLKIVIDYDKQ
KITVSDYSFFISILRNHERGEEKLDIEFLKSENKNTKEFEYDLRKYDIFILKDKSDLYL
PQILLNQIFL NESNIQTYFNGEVNLNFRFVESLSGSGYFYLRQSIKNNETSIPSGLKEFQ
AKYFSLLDHYGKIFNEDETMNESYKGFIEYTKNRITHTNSDIHYLTTREIIRDLDSDH
TAYILDGYYSKNNEVLKHPKSNKRI TDRFNLGKGLKLYFKSNIEYQNVFTPDGKTSVI
SFKAFEENSAVSIKSLNEAKEKGIKNIIFNVTHNGGGYIGAAAYEIMGFLSDKPFNVWTH
NPLTGENKIETIKSKKTKYDFNYFVLTAPFSFAGNIFPQLVRDNNLTKIIGYDTFGSS
AIGYYILPTGDIIQLSSNTVFTDKNFKTTEFGISPDPFKENIETGAKNLYDLQKQFV
NDINKEKKEPNKPINKPDPTEPLPKPAEPSVPI SRPHNNPEFNSDNGNIMI IIPDSGFTP
NNIEKSGKGRKAGI IAGISVGIASGVAALSMSYFLVKKFRK*

```

### TMHMM result

[HELP](#) with output formats

```

# MAG_5760|ID:18180474| Length: 643
# MAG_5760|ID:18180474| Number of predicted TMHs: 1
# MAG_5760|ID:18180474| Exp number of AAs in TMHs: 27.26879
# MAG_5760|ID:18180474| Exp number, first 60 AAs: 2.75652
# MAG_5760|ID:18180474| Total prob of N-in: 0.16586
MAG_5760|ID:18180474| TMHMM2.0 outside 1 615
MAG_5760|ID:18180474| TMHMM2.0 THelix 616 638
MAG_5760|ID:18180474| TMHMM2.0 inside 639 643

```

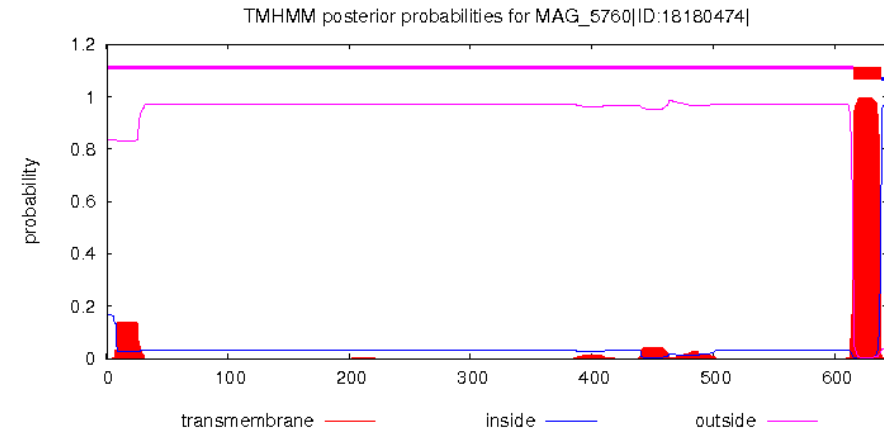



M. alkalescens

1 - AMWK\_v1\_90025 [Mycoplasma alkalescens 14918 WGS NZ\_AMWK] conserved exported protein of unknown function | automatic/finished

Length=665

Score = 225 bits (573), Expect = 2e-71
Identities = 108/154 (70%), Positives = 133/154 (86%), Gaps = 0/154 (0%)

Query 1 TSVISFKNFANSFAKIEESLQQRDGIKNIVLDVSNFSGGYLGTAFEIMGFITDKPFFK 60
Sbjct 367 TSVISFK FE +SA IE+SLK+A+ G+KNIV +++ N GG++G AFEIMGF+TDKPFK 426
Query 61 SYSYNPLTKEQKVETIKSRFKKYDFNYVLTSPFSFAGNIFPQLVKDNNVAKVIGFKTA 120
Sbjct 427 SY+YNPL+ E+K+E I+S++ KYDFNYVLTSP++FSAGNIFPQ+VKDNNV KVIG+KT 486
Query 121 GGASAISQAILPTGDIIQLSSNNVLTNKSHQSLE 154
Sbjct 487 GGASAISYAILPTGDIIQLSSNTVFTDKHFRTE 520

>AMWK\_v1\_90025|ID:22220832| conserved exported protein of unknown function [Mycoplasma alkalescens 14918]

MKISKLKNLIVISSTFILPFAVISAACATKADPPFAVISAACATKADFDESALKEFLIPLA
KELNSQNNRNKIKMYMHNVDVAYVGIKEFLRSISTIIKHDKLTFSFNNDKVKLVKTDLD
EKNNPSLIVDYKSKKIIVSNYKFFTEILKKYERGEKELKISFLKRENQNLNQEFEFDLKK
YNIDILKGGDDLYLPQILLNQVILNESNIQTYFNEDVFNIFRFAESLTGFGSITLKMSPK
NNVKNIPDGLKNFQLKYYPFLLFDYGGIKLDKNKSYKEFFNNYKTDILSNDSDTHYLSLK
KIISDLDLHTAYKLDGYDKSRLSSQIANKTRTNGQIEIGNHLQKYYFKNNTEYQNV
YTSDNKTSVISFKAFEEDSASHIEKSLKEAKEKGVKNIVFNLTNLGGGFIGAFAEIMGFM
TDKPFKSYTYNPLSGEKKIELIQSKYPKYDFNYVLTSPYAFAGNIFPQMVKDNVGVK
IGYKTFGGASAISYAILPTGDIIQLSSNTVFTDKHFRTEFGIEPNFKYDLSKNPEKL
YDLTNIQNIWNISQGFDDVIEVKESDPETKSEHKTSKNNPHMTSNLI PRDSSKHHFSL
NSNSSTIENKSGNISKLAKPVNMSNNVKTAILSTVVIAILAIAISVYFVIRKQKRKLN
LKNEI\*

HELP with output formats

# AMWK\_v1\_90025|ID:22220832| Length: 665
# AMWK\_v1\_90025|ID:22220832| Number of predicted TMs: 1
# AMWK\_v1\_90025|ID:22220832| Exp number of AAs in TMs: 58.41398
# AMWK\_v1\_90025|ID:22220832| Exp number, first 60 AAs: 8.60435
# AMWK\_v1\_90025|ID:22220832| Total prob of N-in: 0.50019
AMWK\_v1\_90025|ID:22220832| TMHMM2.0 outside 1 629
AMWK\_v1\_90025|ID:22220832| TMHMM2.0 TMhelix 630 652
AMWK\_v1\_90025|ID:22220832| TMHMM2.0 inside 653 665

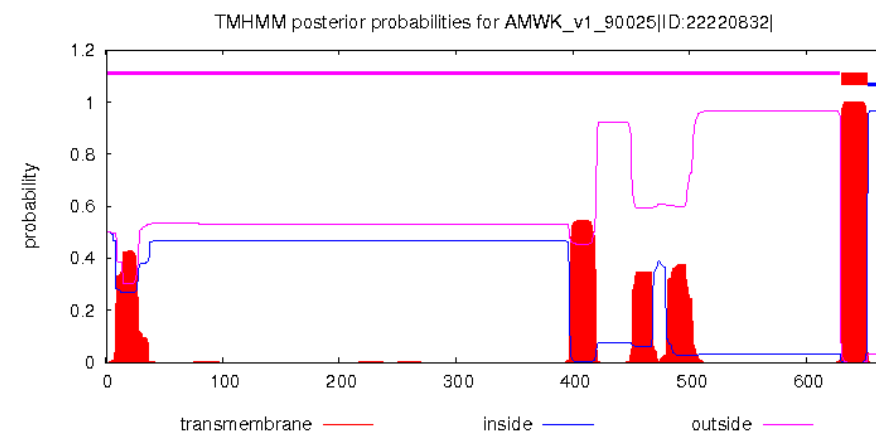



M. auris

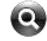

- 1 - AORI\_v1\_120043 [Mycoplasma auris 15026 WGS NZ\_AORI]  
conserved exported protein of unknown function | automatic/finished

Length=731

Score = 209 bits (531), Expect = 3e-65  
Identities = 99/154 (64%), Positives = 132/154 (86%), Gaps = 0/154 (0%)

```

Query 1  TSVISFKNFEANSFAKIEESLKQQRDGIKNIVLDVSNSSGGYLGTAFEIMGFLLDKPFFK 60
          T +ISF+ F+ +A IE+SL+ A+ +GIKNIV +++ NSGGY+G+AFEIMGF+T+KPF
Sbjct 393  TGIISFRAFDMKTASGIEKSLEIAKNEGIKNIVFNITVNSGGYVGSFAFEIMGFMTNKPFY 452

Query 61  SYSYNPLTKEQKQVETIKSRFKKYDFNYVLTSPFSFSAAGNIFPQLVKDNNVAKVIGFKTA 120
          SY+YNPL++E+ VE IKS++KKYDFNY++LTSPFSFSA NI Q+VKDN VAKVIG+KT
Sbjct 453  SYTYNPLSQEKSVEEIKSKYKDYDFNYFILTSPPFSF[AANILAQMVKDNKVAKVIKGYKTH 512

Query 121  GGASAIQAILPTGDIIQLSSNNVLTNKSQSLE 154
          GGASAI+ AILPTGDIIQ+SSN+V ++K+ ++E
Sbjct 513  GGASAINYAILPTGDIIQISSNHVFSKDNFNIE 546

```

>AORI\_v1\_120043|ID:2222831| conserved exported protein of unknown function [Mycoplasma auris 15026]

```

MRLGKKTFFIFSLLVNAILPMSLLSFSVQNKNTNKRLLNKNKLLKNNSSSTFKLKEYEFS
LTKNNSNELKKIELGLYNDVAYIGIKEFLKATKTVTNFNDYSFSWIKLNNKLYKKQKYLE
HNFKDNKVTNLVINKLVNDSDDDDQIQNKYSIEIDFQTKKINVSNYKFFTEILKDYKRGE
EELQIEFLSKKNLNEKTHFSYDLSKYDIEILKDKKDYLPVLLNQILLNESNYQTYFNG
EYFNLFNYFETLGSYGPALLKQSNVNNENIPLGLKEFYKYFPFLFDYIYGIKNKNNQS
YKNFFATYEDDILAENDNHYLATKDIINDLGLDLSHSTSIDGYNHNDNDAIKNIEKEFRKI
RRIRKRAEIEENELGKRDFGKIEYSITYTPDRKTGIISFRAFDMKTASGIEKSLEIAKNEG
IKNIVFNITVNSGGYVGSFAFEIMGFMTNKPFYSYTYNPLSQEKSVEEIKSKYKDYDFNYF
ILTSPPFSF[AANILAQMVKDNKVAKVIKGYKTHGGASAINYAILPTGDIIQISSNHVFSK
NFNIEFGVVKPDIFFEEDIYKNQDQLYDLNLIQQIVNKETNEEAKQDISFLIKNPNLGLL
KSSDFVSLYEALKNKNPNFNIAFDLLEFQSINKIPNEKNEYEVSLKIKDNNNTNYFGTIKL
IFSLEENAKFPNPNNGNTEDRNEKDKNNADKNRPKNKTLR[ILGIFGSLLLVISLILVIVF
LVLKLKKTQK*

```

```

# AORI_v1_120043|ID:2222831| Length: 731
# AORI_v1_120043|ID:2222831| Number of predicted TMHs: 1
# AORI_v1_120043|ID:2222831| Exp number of AAs in TMHs: 43.1445
# AORI_v1_120043|ID:2222831| Exp number, first 60 AAs: 15.49605
# AORI_v1_120043|ID:2222831| Total prob of N-in: 0.66538
# AORI_v1_120043|ID:2222831| POSSIBLE N-term signal sequence
AORI_v1_120043|ID:2222831| TMHMM2.0 outside 1 700
AORI_v1_120043|ID:2222831| TMHMM2.0 TMhelix 701 723
AORI_v1_120043|ID:2222831| TMHMM2.0 inside 724 731

```

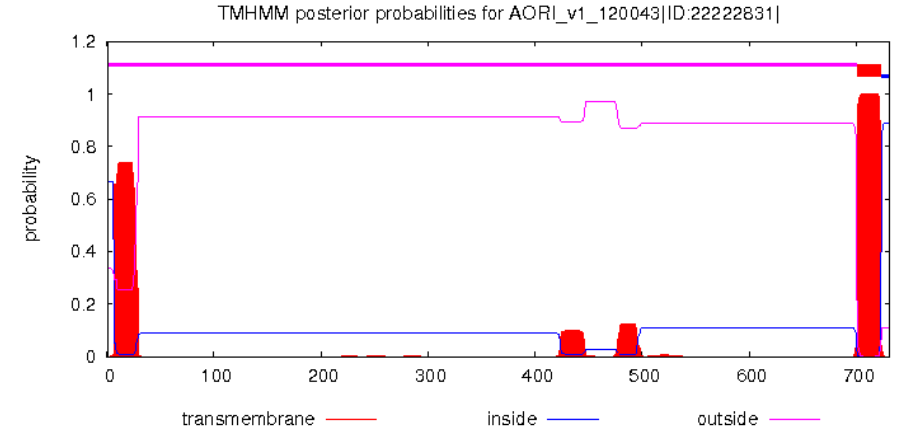

# plot in postscript, script for making the plot in gnuplot, data for plot

*M. bovis*

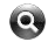

- 1 - [MBOVPG45\\_0421](#) [Mycoplasma bovis PG45 chromosome NC 014760]  
S41B peptidase family lipoprotein | automatic/finished

Length=652

Score = 223 bits (569), Expect = 6e-71  
Identities = 107/154 (69%), Positives = 132/154 (86%), Gaps = 0/154 (0%)

```
Query 1 TSVISFKNF EANS AFKIEESLQAQRDGIKNIVLDVSNSSGGYLGTA FEIMGFLTDKPFK 60
      TSVISFK FE +SA IE+SLK+A+ +KNIV +++ N GG++G AFEIMGF+TDKPFK
Sbjct 354 TSVISFKTFEEDSASHIEKSLKEAKEKSVKNIVFNLTNLGGGFIGA AFEIMGFMTDKPFK 413

Query 61 SYSYNPLTKEQKVETIKSRFKKYDFNYYVLTSPFSFSAGNIFPQLVKDNNVAKVIGFKTA 120
      SY+YNPL+ E+K+E I+S++ KYDFNYYVLTSP++FSAGNIFPQ+VKDNNV KVIG+KT
Sbjct 414 SYTYNPLS GEEKKIELIQSKYPKYDFNYYVLTSPYAFSAGNIFPQMVKDNNVGVIGYKTF 473

Query 121 GGAS AISQA ILPTGDI IQLSSNNVLTNKSHQSLE 154
      GGAS AIS AILPTGDI IQLSSN V T+K ++ E
Sbjct 474 GGAS AISYAILPTGDI IQLSSNTVFTDKHFRTTE 507
```

```
>MBOVPG45_0421|ID:18177276| S41B peptidase family lipoprotein [Mycoplasma bovis PG45]
MKISKIRNLVISSAFILPFTVISATCETKADFDESALKEFLIIPLAKELNGRIDRKNNKI
KMYMHNDAVAYVGIKEFLRSISTIKHDKLTFNFNDKVKLVKTDLDEKNNPSLTVDYKL
KKIIVSNYKFFTEILKKYERGEKLIKISFLKRENQNLNEEFEDLKKYNIDILKGDLDLY
LPQILLNQVILNESNIQTYFNDDVFNIFRFAESLTGFGSISLKMSPKNNVKNIPDGLKNF
QLKYYPFLFDYGYGKLDKNKSYKEFFNNYKTDILSNDSDTHYLSTKKIISDLDDPHTAY
KLDGYDYSRDLSSRQIANKKRTNGQIELGNHLQKQYFKNNEYQNVYTPDNKTSVISFK
TFEEDSASHIEKSLKEAKEKSVKNIVFNLTNLGGGFIGA AFEIMGFMTDKPFKSYTYNPL
SGEEKKIELIQSKYPKYDFNYYVLTSPYAF SAGNIFPQMVKDNNVGVIGYKTFGGAS AIS
YAILPTGDI IQLSSNTVFTDKHFRTTEFGIEPNFKFYDLSKNPEKLYDLTNIQNI VNNI
SQGKFDVIEVKESEPETKSEHKT SKNNPHMNSNLMPRNSSKEHFSLNSNSSTIENKSDN
ISKLSAKSVNMSNNVKIAIILSTVVIAILAIAISVYFVIKKQKRKLNKNEI
```

```
# MBOVPG45_0421|ID:18177276| Length: 652
# MBOVPG45_0421|ID:18177276| Number of predicted TMHs: 1
# MBOVPG45_0421|ID:18177276| Exp number of AAs in TMHs: 58.92705
# MBOVPG45_0421|ID:18177276| Exp number, first 60 AAs: 1.08566
# MBOVPG45_0421|ID:18177276| Total prob of N-in: 0.69144
MBOVPG45_0421|ID:18177276| TMHMM12.0 outside 1 616
MBOVPG45_0421|ID:18177276| TMHMM12.0 TMhelix 617 639
MBOVPG45_0421|ID:18177276| TMHMM12.0 inside 640 652
```

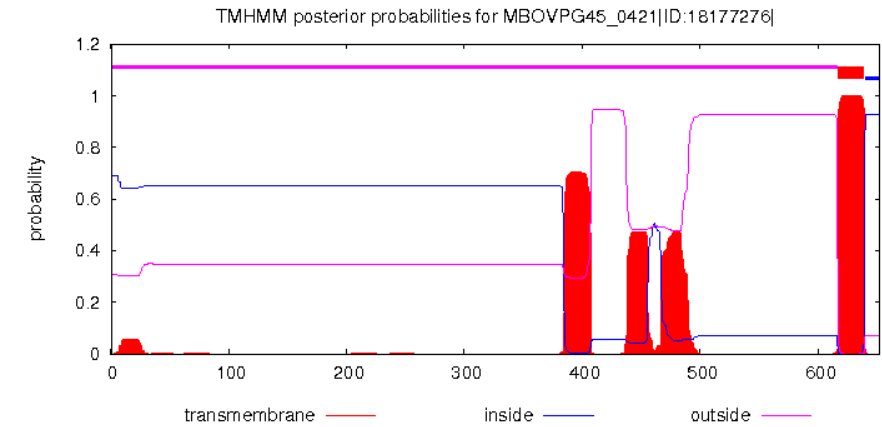

# [plot](#) in postscript, [script](#) for making the plot in gnuplot, [data](#) for plot

2 - **MCAP\_0328** [Mycoplasma capricolum subsp. capricolum ATCC 27343 chromosome NC\_007633]  
 hypothetical protein | automatic/finished

Length=682

Score = 226 bits (575), Expect = 1e-71  
 Identities = 107/154 (69%), Positives = 132/154 (86%), Gaps = 0/154 (0%)

```

Query 1  TSVISFKNFANSFAFKIEESLKAQRDGIKNIVLDVSNFSGGYLGTAFAEIMGFLLTDKPFK 60
          TSVISFK FE ++A +IE+SLK+AQ GIKNI+ +V+ N GG++G A+E+MGFLLTDKPF
Sbjct 348 TSVISFKQFEIDTAKQIEKSLKEAQNKGIKNIIFNVTQNGGGFIGAAYELMGFLLTDKPFN 407

Query 61  SYSYNPLTKEQKVETIKSRFKKYDFNYVLTSPFSFAGNIFPQLVKDNNVAKVIGFKTA 120
          Y+YNPL+KEQKVETIKS++ KY+FNYY+LTSP+SFSAGNIFPQ+ KDN VAK+IG+KT
Sbjct 408 VYNYNPLSKEQKVETIKSKYNKYNFNYYILTSFYFAGNIFPQITKDNKVAKLIIGYKTF 467

Query 121 GGASAIQAILPTGDIIQLSSNNVLTNKSQSLE 154
          GGAS+I ILPTGDIIQLS+NNV TN +SLE
Sbjct 468 GGASSIGYFILPTGDIIQLSTNNVFTNKKFRSLE 501
  
```

>MCAP\_0328|ID:18107887| hypothetical protein [Mycoplasma capricolum subsp. capricolum ATCC 27343]

```

MKLLLSLFLFSNTITPVLTSVNIIVSTNNTLSLKEYKLNLSLTKSVEIKNKKKINLHLHK
DVGYSIKIEFLDSIEPIIKFNDIKHEFKNNKAIITLNSKI PNLKIEFDYKTQDIIVSNNN
IFTEILKYKERGEEKLNLEFQNLKNEPNTQFKYHLKDYDIEMLDKQKDIYLPVLLNQI
FLNESNIQVYFNDDEVNIFRFADSLKDISGIVNLKMSKANMSNSIPKSLKEFQYKYFAFL
FDHYYGIKLPNNKSYIDYFKKYEQKIINFNSDLHYLTTTRQIVADLDDPHSAYILDGFYFK
EKDINKVQITGNTKEHRYDWNINIQSLLAQHDPSKIEYQNRFLSDNKTSVLSFKQFEIDT
AKQIEKSLKEAQNKGIKNIIFNVTQNGGGFIGAAYELMGFLLTDKPFNVYNYNPLSKEQKV
ETIKSKYNKYNFNYYILTSFYFAGNIFPQITKDNKVAKLIIGYKTFGGASSIGYFILPT
GDIIQLSTNNVFTNKKFRSLEFGVVKPDVMLNGSVETNAKDLYDDNKLELNLKADKISFT
NDDSTIKPIDTIPLKPKPNKNEIKPKLSLSKLIKNNKIKISKNDPITLLKELFENNDP
INFDQEIRISLQPNKAEIYLENNPNDKIVNFVSKDISEQNQNVKNNKTKLIIIISSS
LLVVIVSLLLTFLIIKKLKNKK*
  
```

```

# MCAP_0328|ID:18107887| Length: 682
# MCAP_0328|ID:18107887| Number of predicted TMHs: 1
# MCAP_0328|ID:18107887| Exp number of AAs in TMHs: 27.42851
# MCAP_0328|ID:18107887| Exp number, first 60 AAs: 0.33329
# MCAP_0328|ID:18107887| Total prob of N-in: 0.01047
MCAP_0328|ID:18107887| TMHMM2.0 outside 1 652
MCAP_0328|ID:18107887| TMHMM2.0 TMhelix 653 675
MCAP_0328|ID:18107887| TMHMM2.0 inside 676 682
  
```

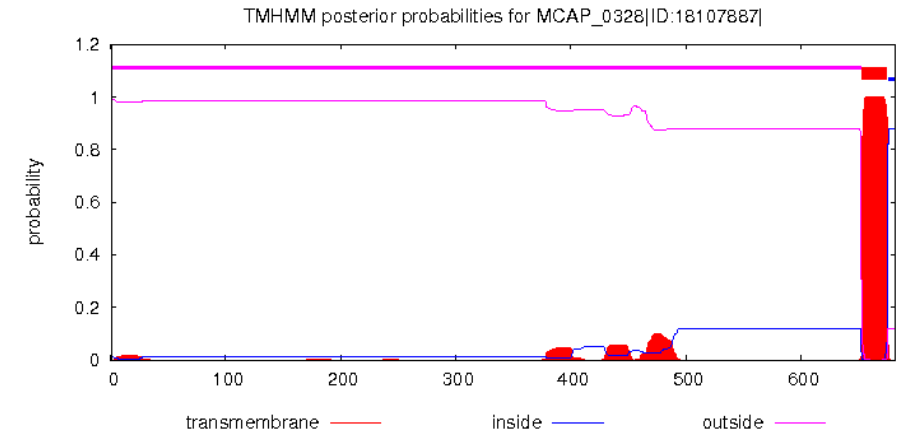

# [plot](#) in postscript, [script](#) for making the plot in gnuplot, [data](#) for plot

*M. capricolum* subsp. *capripneumoniae*

 - 1 - [MCCP01v2\\_0297](#) [*Mycoplasma capricolum* subsp *capripneumoniae* Abomsa chromosome AbomsaV06]

putative conserved membrane protein | validated/finished

Length=656

Score = 276 bits (706), Expect = 6e-91  
Identities = 138/154 (90%), Positives = 149/154 (97%), Gaps = 0/154 (0%)

```
Query 1 TSVISFKNFEANSAFKIEESLQQRDGIKNIIVLDVSFNSSGGYLGTAFEIMGFLLTKPFK 60
Sbjct 384 TS+ISFKNFE +SA KIE+SL +A+++ +KNIVLDVSFNSSGG LGTA+EIMGFLLTKPFK 443

Query 61 SYSYNPLTKEQKVETIKSRFKKYDFNYYVLTSPFSFSAGNIFPQLVKDNNVAKVIGFKTA 120
Sbjct 444 SYSYNPLTKEQKVETIKSRFKKYDFNYYVLTSPFSFSAGNIFPQLVKDNNVAKVIGFKTA 503

Query 121 GGASAIQAILPTGDIQLSSNNVLTNKSHQSLE 154
Sbjct 504 GGASAIQAILPTGDIVQLSSNHVLTNKSHQSLE 537
```

>MCCP01v2\_0297|ID:20167940| putative conserved membrane protein [*Mycoplasma capricolum* subsp *capripneumoniae* Abomsa]

```
MKLVTKLSAISLGAFSIFAPIAVINLLTTKNNLLITKRFLSSNSNSNFEKAYDYVNLIDNKYLDKINLHNNHGIAYIGVKEFLKALDGLISFSKIRVKPTHNSTFFKEKEITYKFNKDKVTLNSVTKYSNNSQNNNTNYQLEIDSKNNTITVSDNDFFTDIFAFYRRGEEDLNIDFLDTKILNKNKHIVFDLKKYDIDVLDNKKDLYLPLVLINQLFLNQSNVQLYFNGERINLFAYSKTLRRVDFLKQLKQSYFNNVNTISLGLKDFQHKYLGFLFDHYGKLDKNASYKDLFKKYEKYIKADNTTHYLTSRYLIEQLDDLHSSYLLTGYYNKNLDTINRAVLNTSTPRSDKYKDIARRLSFYNKELNYKNVYTPDKKTSIISFKNFEIDSACKIEQSLIEAKNNVKNIVLDVSFNSSGGLLGTAYEIMGFLLTKPFKSYSYNPLTKEQKVETIKSRFKKYDFNYYVLTSPFSFAGNIFPQLVKDNNVAKVIGFKTAGGASAIQAILPTGDIVQLSSNHVLTNKSHQSLEYGVSFDIKFNFPNETKKLFDSSFIQDVVNKDTSKLKNPNFSQTSFVEPNLVHELLKKPTSLQLNKDQKQENDIKNNNSLFSLSKSELRTKEALFVLGVIGLLASITTFIIKKIKK
```

```
# MCCP01v2_0297|ID:20167940| Length: 656
# MCCP01v2_0297|ID:20167940| Number of predicted TMHs: 2
# MCCP01v2_0297|ID:20167940| Exp number of AAs in TMHs: 42.23023
# MCCP01v2_0297|ID:20167940| Exp number, first 60 AAs: 21.40802
# MCCP01v2_0297|ID:20167940| Total prob of N-in: 0.96572
# MCCP01v2_0297|ID:20167940| POSSIBLE N-term signal sequence
MCCP01v2_0297|ID:20167940| TMHMM2.0 inside 1 6
MCCP01v2_0297|ID:20167940| TMHMM2.0 TMhelix 7 29
MCCP01v2_0297|ID:20167940| TMHMM2.0 outside 30 631
MCCP01v2_0297|ID:20167940| TMHMM2.0 TMhelix 632 651
MCCP01v2_0297|ID:20167940| TMHMM2.0 inside 652 656
```

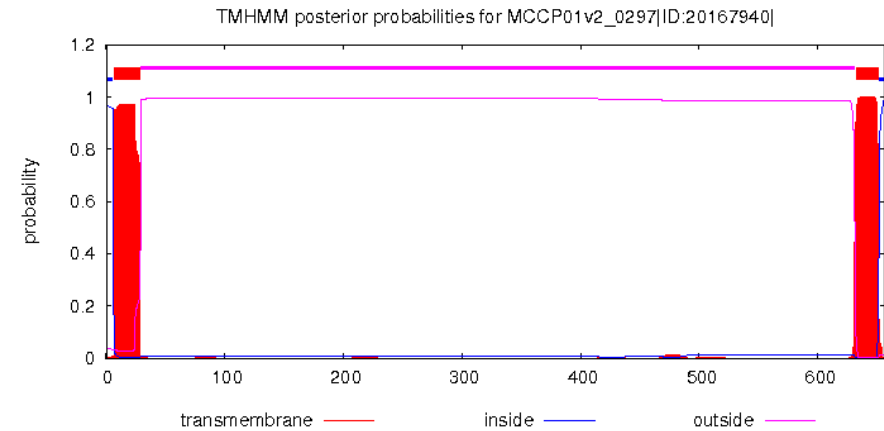

# [plot](#) in postscript, [script](#) for making the plot in gnuplot, [data](#) for plot

 - 2 - [MCCP01v2\\_0400](#) [Mycoplasma capricolum susbp capripneumoniae Abomsa chromosome AbomsaV06]

Peptidase, S41 family | validated/finished

Length=683

Score = 228 bits (580), Expect = 3e-72  
Identities = 108/154 (70%), Positives = 133/154 (86%), Gaps = 0/154 (0%)

```
Query 1 TSVISFKNFANSFAFKIEESLKQQRDGIKNIVLDVSNFSGGVLGTAFEIMGFLTDKPFK 60
      TSVISFK FE ++A +IE+SLK+AQ GIKNI+ +V+ N GG++G A+E+MGFLTDKPFK
Sbjct 349 TSVISFKQFEIDTAKQIEKSLKEAQNKGIKNIIFNVNQNGGGFIGAAYELMGFLTDKPFK 408

Query 61 SYSYNPLTKEQKVETIKSRFKKYDFNYVLTSPFSFSGAGNIFPQLVKDNNVAKVIGFKTA 120
      Y+YNPL+KEQKVETIKS++ KY+FNYY+LTSP+SFSAGNIFPQ+ KDN VAK+IG+KT
Sbjct 409 VYNYNPLSKEQKVETIKSKYKNYFNYYILTSPYFSAGNIFPQITKDNKVAKIIGYKTF 468

Query 121 GGASAIQAILPTGDIIQLSSNNVLTNKSQSLE 154
      GGAS+I ILPTGDIIQLS+NNV TN +SLE
Sbjct 469 GGASSIGYFILPTGDIIQLSTNNVFTNNKFKSLE 502
```

>MCCP01v2\_0400|ID:20168043| Peptidase, S41 family [Mycoplasma capricolum susbp capripneumoniae Abomsa]

MKLLLTSLFLFSNTITPVLTN SINIVENTSNTISLKEYKLNLSLTKDIKTMKKKINLHLH  
NNVGYSVKEFLDSIEPIIKFNDIKHEFKNNKTIITLTSKIPNLKIEFDYKTQDITVSNN  
NIFTEILKDKERGEKLNLEFQNLKNNENPNTQFKYHLKDYDIEMLDKQKDIYLPVLLNQ  
IFLNEISNIQVYFNDDEVNIFRFAETLSNFINIVNLKGLKSSQKTTIPKNLKEFQYNYLGF  
LFDHYYGIKLKDKNFYRNYFQSYKNWII SDSNNKHYLATKQLIADLDDPHSAFIMDGYFN  
KGEEYNKTKIESKSEVKRYKWDLHLLAQHDPKIEYQNRFLSDNKT SVISFKQFEID  
TAKQIEKSLKEAQNKGIKNIIFNVNQNGGGFIGAAYELMGFLTDKPFKVYNYNPLSKEQK  
VETIKSKYKNYFNYYILTSPYFSAGNIFPQITKDNKVAKIIGYKTFGGASSIGYFILP  
TGDIQLSTNNVFTNNKFKSLEFGVKPDVMLNGSVETNAKDLYDDNKLLELINKADKISF  
GNDDSTIKPIDTIPKPKDPNTNGIKPKISLSKLIKNNKIKISKNDPITLLKELFENN  
DINFQEIIRISLKQPNKAEIYLENNPNDKITVNFSLVKDISEQNQNIKNNKTKLIIISS  
SLLVVIVSLLLTFLIKKLNKK\*

```
# MCCP01v2_0400|ID:20168043| Length: 683
# MCCP01v2_0400|ID:20168043| Number of predicted TMHs: 1
# MCCP01v2_0400|ID:20168043| Exp number of AAs in TMHs: 25.45824
# MCCP01v2_0400|ID:20168043| Exp number, first 60 AAs: 0.1782
# MCCP01v2_0400|ID:20168043| Total prob of N-in: 0.00576
MCCP01v2_0400|ID:20168043| TMHMM2.0 outside 1 653
MCCP01v2_0400|ID:20168043| TMHMM2.0 TMhelix 654 676
MCCP01v2_0400|ID:20168043| TMHMM2.0 inside 677 683
```

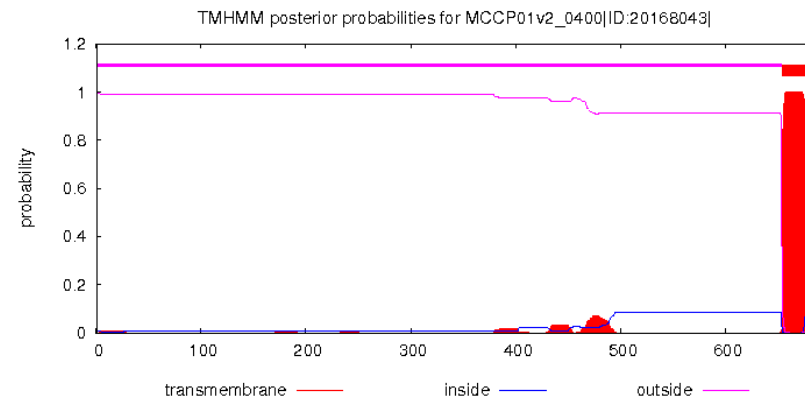

# [plot](#) in postscript, [script](#) for making the plot in gnuplot, [data](#) for plot

*M. leachii*

 - 2 - [MSB\\_A0342](#) [Mycoplasma leachii PG50 chromosome NC\_014751]  
peptidase, S41 family | automatic/finished

Length=683

Score = 226 bits (576), Expect = 1e-71  
Identities = 108/154 (70%), Positives = 132/154 (86%), Gaps = 0/154 (0%)

```
Query 1 TSVISFKNF EANS AFKIEESLKQAQRDGIKNI VLDVSN SGGYLGTA FEIMGFLTDKPFK 60
TSVISFK FE ++A +IE+SLK+AQ GIKNI+ +V+ N GG++G A+EIMGFLTDKPF
Sbjct 349 TSVISFKKFEIDTAKQIEKSLKEAQN RGIKNI IFNVTQNGGGFIGAAYEIMGFLTDKPFN 408

Query 61 SYSYNPLTKEQKVETIKSRFKKYDFNYVLTSPFS SAGNIFPQLVKDNNVAKVIGFKTA 120
Y+YNPL+KEQKVETIKS++ KY+FNYY+LTSP+SFSAGNIFPQ+ KDN VAK+IG+KT
Sbjct 409 VYNYNPLSKEQKVETIKSKYKNYFNYYILTSPYS SAGNIFPQITKDNKVAKIIGYKTF 468

Query 121 GGASAI SQAILPTGDIIQLSNNVLTNKSHQSLE 154
GGAS+I ILPTGDIIQLS+NNV TN +SLE
Sbjct 469 GGASSIGYFILPTGDIIQLSTNNVFTNNKFRSLE 502
```

```
>MSB_A0342|ID:18097814| peptidase, S41 family [Mycoplasma leachii PG50]
MKLLLTSLFLLSNTIAPVLTNSVNI IENTTNTLSLKEYKLN SLTKDVKTMKKKNISLHLH
KDVGYVSIKEFLDSIEPIIKFNDIKHEFKNNKTIVTLTSKIPNLKIEFDYKTQDIIVSNN
NIFTEILKNKERGEEKLNLEFQNLKNEPNTQPKYHLKDYDIEMLKDQKDIYLPVLLNQ
IFLNESNIQVYFNDDEVSI FRFAETLSNF INIVNLKGLKSSQKTTIPKTLKEFQYKYFAF
LFDHYYGIKLKNRFRYKNYFQNYKSQITSDSNDKHYLATKQLIEDLDDPHSAFTMDGYFN
KGEENKTKIESKSKVKRYKKWNTDLHLLAQHDP SKIEYQNRFLSDNKTSVISFKKFEID
TAKQIEKSLKEAQN RGIKNI IFNVTQNGGGFIGAAYEIMGFLTDKPFNVYNYNPLSKEQK
VETIKSKYKNYFNYYILTSPYSF SAGNIFPQITKDNKVAKIIGYKTFGGASSIGYFILP
TGDI IQLSTNNVFTNNKFRSLEFGV KPDVMLNGSVETNAKDLYDDNKLELILINKADKISF
KNDDSTIKPIDTIP LKPDKPNKNEIKPKISLSKLIKNKNIKISKNDPITLLKELFKNNP
DINF DQEIRISLQPNKAEIYLENNPNDKIIINF SIVKDISEQNQLKNNKTKL I I I I S S
SLLVVIVSLLLTFLIIKKLKNKK*
```

```
# MSB_A0342|ID:18097814| Length: 683
# MSB_A0342|ID:18097814| Number of predicted TMs: 1
# MSB_A0342|ID:18097814| Exp number of AAs in TMs: 26.54633
# MSB_A0342|ID:18097814| Exp number, first 60 AAs: 0.31539
# MSB_A0342|ID:18097814| Total prob of N-in: 0.00794
MSB_A0342|ID:18097814| TMHMM12.0 outside 1 653
MSB_A0342|ID:18097814| TMHMM12.0 TMhelix 654 676
MSB_A0342|ID:18097814| TMHMM12.0 inside 677 683
```

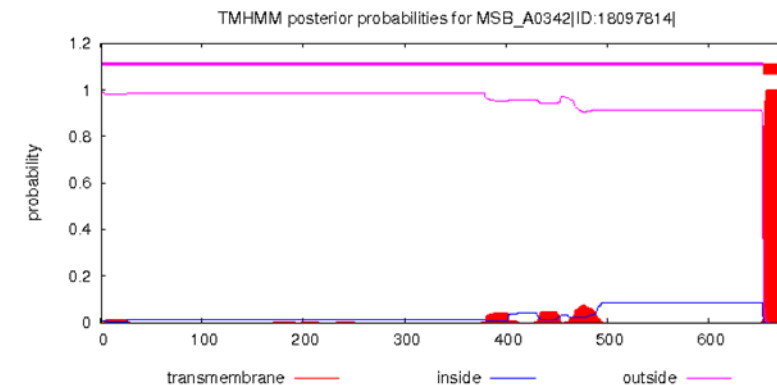

# [plot](#) in postscript, [script](#) for making the plot in gnuplot, [data](#) for plot

Mmm

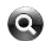

- 1 - [MMS\\_A0313](#) [Mycoplasma mycoides subsp. mycoides SC Gladysdale chromosome NC\_021025]  
peptidase, S41 family | automatic/finished

Length=636

Score = 291 bits (744), Expect = 1e-96  
Identities = 149/154 (97%), Positives = 150/154 (97%), Gaps = 0/154 (0%)

```

Query 1  TSVISFKNFANSFAKIEESLKQAQRDGIKNIVLDVSNFSGGGLGTAFEMGFLTDKPFK 60
          TSVISFKNFE NSAFKIEESLKQAQRDGIKNIVLDVSNFSGG LGTA+EIMGFLTDKPFK
Sbjct 380 TSVISFKNFEPNSAFKIEESLKQAQRDGIKNIVLDVSNFSGGLLTAYEIMGFLTDKPFK 439

Query 61 SYSYNPLTKEQKVETIKSRFKKYDFNYVLTSPFSSAGNIFPQLVKDNNVAKVIGFKTA 120
          SYSYNPLTKEQKVETIKSRFKKYDFNYVLTSPFSSAGNIF QLVKDNNVAKVIGFKTA
Sbjct 440 SYSYNPLTKEQKVETIKSRFKKYDFNYVLTSPFSSAGNIFSQLVKDNNVAKVIGFKTA 499

Query 121 GGASAISQAILPTGDIIQLSSNNVLTNKSHQSLE 154
           GGASAISQAILPTGDIIQLSSN VLTNKSHQSLE
Sbjct 500 GGASAISQAILPTGDIIQLSSNYVLTNKSHQSLE 533

```

>MMS\_A0313|ID:18111339| peptidase, S41 family [Mycoplasma mycoides subsp. mycoides SC Gladysdale]

```

MKLVTKLSAISLGAFSIFAPIAVINNLTTENLLISKRFLLSSNSDFELKAYDYVNLIDN
KYINTKINLHNHNGVAYIGVKEFLKALDGLISFSKIIVKPTHNSTFFKEKEITYKFNKDK
VTLNSVTKYSNNNKTTNYQLEIDSKNKTITVSDNDFDTIDFTFYRRGEEDLNIDFLDTKI
LNKNKHIVFDLNKYGIEILNDQNDLYLPLVLINQLFLNQSNIQLYFNGERINLFAYSKTL
RRVDFLKQLKHSYLNQNHIPVGLKDFQHKYLGFLDFHFGYIKLDKNASYKDLFKKYEKY
IKADNTTHYLTSRYLIGQLDDLHSSYLLTGYYNKDLETINKAVLKTTPRSDRFKDIARR
LSAYYGLNKNVYTPDRKTSVISFKNFEPNSAFKIEESLKQAQRDGIKNIVLDVSNFSG
GLLTAYEIMGFLTDKPFKSYSYNPLTKEQKVETIKSRFKKYDFNYVLTSPFSSAGNI
FSQLVKDNNVAKVIGFKTAGGASAISQAILPTGDIIQLSSNYVLTNKSHQSLEYGVNPD
TLGFDPFKQTEKFFDSAYIQQAINKDTNTLNSIPATHSSVIEPNYVHELVEKQPQLQSR
KTDQTERKDAYFVLGALGVVISLAIPFVILKLLKK*

```

```

# MMS_A0313|ID:18111339| Length: 636
# MMS_A0313|ID:18111339| Number of predicted TMHs: 2
# MMS_A0313|ID:18111339| Exp number of AAs in TMHs: 48.63485
# MMS_A0313|ID:18111339| Exp number, first 60 AAs: 28.85361
# MMS_A0313|ID:18111339| Total prob of N-in: 0.91733
# MMS_A0313|ID:18111339| POSSIBLE N-term signal sequence
MMS_A0313|ID:18111339| TMHMM2.0      inside 1 6
MMS_A0313|ID:18111339| TMHMM2.0      TMhelix 7 29
MMS_A0313|ID:18111339| TMHMM2.0      outside 30 610
MMS_A0313|ID:18111339| TMHMM2.0      TMhelix 611 630
MMS_A0313|ID:18111339| TMHMM2.0      inside 631 636

```

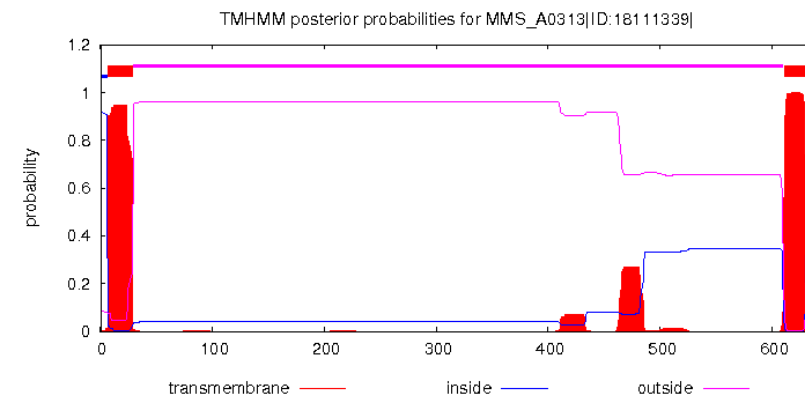

# plot in postscript, [script](#) for making the plot in gnuplot, [data](#) for plot



 - 2 - **MMS\_A0112** [*Mycoplasma mycoides* subsp. *mycoides* SC Gladysdale chromosome NC\_021025]  
peptidase, S41 family | automatic/finished

Length=711

Score = 211 bits (538), Expect = 4e-66  
Identities = 102/154 (66%), Positives = 127/154 (82%), Gaps = 0/154 (0%)

```

Query 1   TSVISFKNFEANSAFKIEESLQKQARDGIKNIIVLDVSNFSGGYLGTAFEIMGFLTDPKPFK 60
          TSVISF F+ S I +SLKQA+ + IKNI+ +++ N GGY+G AFEI+GFLT+KPF
Sbjct 343 TSVISFSKFDEKSTDYILKSLKQAKENNIKNIIFNLTQNGGGYIGVAFEILGFLTNPFPN 402

Query 61  SYSYNPLTKEQKVETIKSRFKKYDFNYVLTSPFSFSAAGNIFPQLVKDNNVAKVIGFKTA 120
          YSYNPL+KE+KVETIKS+++ +DF YY+LTSP+SFSAGNIFPQ+ +DN VAK+IG+KT
Sbjct 403 VYSYNPLSKEKKVETIKSKYENFDFKYYILTSFYSAAGNIFPQVARDNKVAKLIGYKTF 462

Query 121 GGASAIQAAILPTGDIIQLSSNNVLTNKSQSLE 154
          GGASAI+ ILPTGDIIQLSSNNV TN +SLE
Sbjct 463 GGASAINYYILPTGDIIQLSSNNVFTNDKFESLE 496
  
```

>MMS\_A0112|ID:18111780| peptidase, S41 family [*Mycoplasma mycoides* subsp. *mycoides* SC Gladysdale]

MKITTILSSLSLSSLSSTPVLNLSFINTTTNKIQTKFNLDNLTIKNNRTSKKIQAFLH  
NDVFYTSINEFLKNIDSVINYSNLEHSFKDNKTTIKLKNDSNFFVEFDYLLKKIIVSNNK  
IFTKILKNYKRAEEDLKIEFIKEQNLNNTNQFEIDLKYNIDILKQNDLYLPSILLNQV  
FLSKSNIQTYFNGDDFKIFRFYEGLSLPGTFYLYKQSDKNNQNKIPIGLRRFQYEYLSFLF  
DNYYAIIKLDNKSFKYFKYETQILSESSNEHYLATKKIINDLDDPHSAYVLDGYYDKD  
RNFHKTLEFENKQVRKNSDKILDLLARNDPNKIDVNSFINDDTSVISFSKDFDEKSTDYIL  
KSLKQAKENNIKNIIFNLTQNGGGYIGVAFEILGFLTNPFPNVYSYNPLSKEKKVETIKS  
KYENFDFKYYILTSFYSAAGNIFPQVARDNKVAKLIGYKTFGGASAINYYILPTGDIIQ  
LSSNNVFTNDKFESLEFGVTPDVELDQVYKNSAIYQKETLLDLIKKADSIIKTKKEIR  
TEKLTKILDISKKIENNKTELTKKPKDVKVLLKKEEIIYKKPDSINHNAENDEIKNELIK  
EKTNIESLNINKNLNLGKLDKIDENQILIALKKNLELDINNLEVKNITNNSAEILQKNTD  
QKFIVHFLKTPVKTSNKNTI**WIVLIIIGLTLGLINFIIR**KLKTKKLNK\*

```

# MMS_A0112|ID:18111780| Length: 711
# MMS_A0112|ID:18111780| Number of predicted TMHs: 1
# MMS_A0112|ID:18111780| Exp number of AAs in TMHs: 23.79443
# MMS_A0112|ID:18111780| Exp number, first 60 AAs: 0.53607
# MMS_A0112|ID:18111780| Total prob of N-in: 0.02528
MMS_A0112|ID:18111780| TMHMM2.0 outside 1 678
MMS_A0112|ID:18111780| TMHMM2.0 TMhelix 679 701
MMS_A0112|ID:18111780| TMHMM2.0 inside 702 711
  
```

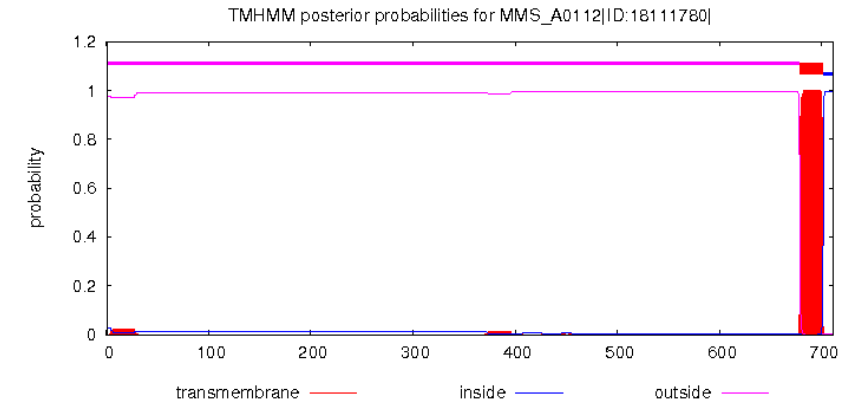

*M. putrefaciens*

 - 1 - [MPUT\\_0240](#) [Mycoplasma putrefaciens KS1 chromosome NC\_015946]  
automatic/finished

Length=487

Score = 211 bits (536), Expect = 2e-67  
Identities = 100/154 (65%), Positives = 132/154 (86%), Gaps = 0/154 (0%)

```
Query 1 TSVISFKNFANSFAFKIEESLKQAQRDGIKNIVLDFVNSGGYLGTAFEIMGFLLTKPFK 60
      T +I F+ F+ ++A +E SLKQA++ +KNIVLD+S N GG++G+A+EI+GFLTD+ FK
Sbjct 185 TGIIGFQGFHDSTAKHLENSLKQAKQLNLKNIVLDFSRNGGGFFIGSAYEILGFLLDQAFK 244

Query 61 SYSYNPLTKEQKVETIKSRFKKYDFNYVLTSPFVSAGNIFPQLVKDNNVAKVIGFKTA 120
      YSYNPL+K+QK+ETIKS+++KYDFNYVLT SP+SFS NIF Q+ KDNN+AKVIG+++
Sbjct 245 IYSYNPLSKDQKIETIKSKYQKYDFNYVLTISPYSFSAANIFAQITKDNNLAKVIGYQSF 304

Query 121 GGASAISQAILPTGDIIQLSSNNVLTNKSHQSLE 154
      GGASAIS A+LPTGDIIQLSSN+V T+K +SLE
Sbjct 305 GGASAISYAVLPTGDIIQLSSNDVFTDKHFKSLE 338
```

**Annotated as pseudo-gene with a frameshift at the N-terminal part.**

```
>MPUT_0240|ID:22290485| [Mycoplasma putrefaciens KS1]
MLKDQTDIYLPFVLLNQLFLNQSNIQLYFNDSEVNFRRFAESLSDLIATVHLKRSVPVQQ
NKIPNGLKQFYRYLAFLLDHYAIAKPKNTTSYKDLLKYYHDQILATNSTDHYLATRKLII
KELDDPHSAYILDGYDKAKDFNKLTLTNNNSNPRTEFKNQLFNLLASYDKPKFEYQLLTT
ADQQTGIIGFQGFHDSTAKHLENSLKQAKQLNLKNIVLDFSRNGGGFFIGSAYEILGFLLD
QAFKIYSYNPLSKDQKIETIKSKYQKYDFNYVLTISPYSFSAANIFAQITKDNNLAKVIG
YQSFGGASAISYAVLPTGDIIQLSSNDVFTDKHFKSLEFGVSPDLKLPNDINDFKNLYN
YYLLQDLINKDNPSTDLANKTSLLALIKNTNLKVAKNDPKTLVQALIQSNAEVDLANKEL
IVILKAANRAEIIYLADDDPNKITVTFQVVGSNHFNQSSTTILAILAPIIVILLVSVIVFF
NKNKLLK*
```

```
# MPUT_0240|ID:22290485| Length: 487
# MPUT_0240|ID:22290485| Number of predicted TMHs: 1
# MPUT_0240|ID:22290485| Exp number of AAs in TMHs: 26.78106
# MPUT_0240|ID:22290485| Exp number, first 60 AAs: 0.1212
# MPUT_0240|ID:22290485| Total prob of N-in: 0.13490
MPUT_0240|ID:22290485| TMHMM2.0 outside 1 458
MPUT_0240|ID:22290485| TMHMM2.0 TMhelix 459 481
MPUT_0240|ID:22290485| TMHMM2.0 inside 482 487
```

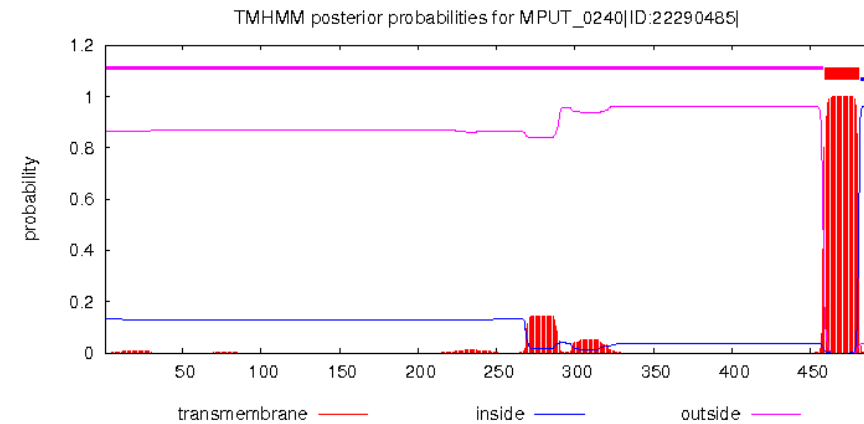

```

# VEU54887.1 Length: 683
# VEU54887.1 Number of predicted TMHs: 1
# VEU54887.1 Exp number of AAs in TMHs: 26.54633
# VEU54887.1 Exp number, first 60 AAs: 0.31539
# VEU54887.1 Total prob of N-in: 0.00794
VEU54887.1 TMHMM2.0 outside 1 653
VEU54887.1 TMHMM2.0 TMhelix 654 676
VEU54887.1 TMHMM2.0 inside 677 683

```

**M. salivarium**

```

>VEU54887.1 Probable CtpA-like serine protease [Mycoplasma salivarium]
MKLLLSLFLLSNTIAPVLTNSVNIIENTTNTLSLKEYKLNLSLTKDVKTMKKKNISLHLHKDVGYSIKE
FLDSIEPIIKFNNDIKHEFKNNKTIVTLTSKIPNLKIEFDYKTQDIIVSNNNIFTEILKNKERGEEKLNLE
FQNLKNENPNTQFKYHLKDYDIEMLDKQKDIYLPVLLNQIFL NESNIQVYFNDDEVSIFRFAETLSNFI
NIVNLKGLKSSQKTTIPKTLKEFQYKYFAFLFDHYYGIKLDNRFYKNYFQNYKSQITSDSNDKHYLQTK
QLIEDLDDPHSAFTMDGYFNKGEEYNTKIESKSKVKRYKKWNTLHLLAQHDPSKIEYQNRFLSDNKTS
VISFKKFEIDTAKQIEKSLKEAQNRIKNIIFNVTQNGGGFIGAAEIMGFLTDKPFVNYNPLSKEQK
VETIKSKYKNYFNYYILTSYSPYSFAGNIFPQITKDNKVAKIIGYKTFGGASSIGYFILPTGDIQLSTN
NVFTNNKFRSLFEGVDPVMLNGSVETNAKDLDDNKLEL INKADKISFKNDDSTIKPIDTIPKPKDK
PNKNEIKPKISLSKLIKKNKIKSKNDPITLLKELFKNNPDINFDQEIRISLQPNKAEIYLENNPNDKI
IINFSIVKDISEQNQLKNNKTKLIIISSLLVVIVSLLTFLIKKLNKK

```

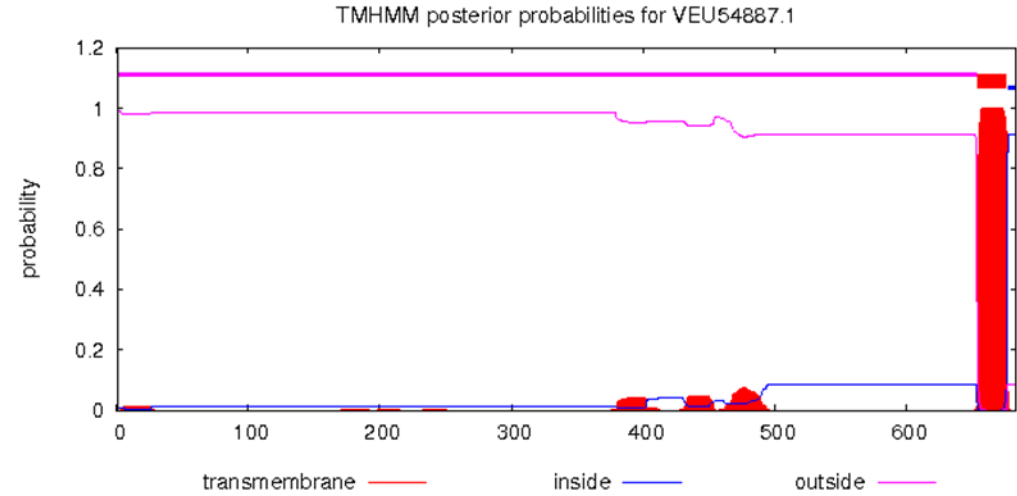

**VEU54887.1**

Prediction: Signal peptide (Sec/SPI)

Cleavage site between pos. 22 and 23: TNS-VN

Probability: 0.2142

| Protein type | Signal peptide (Sec/SPI) | TAT signal peptide (Tat/SPI) | Lipoprotein signal peptide (Sec/SPII) |
|--------------|--------------------------|------------------------------|---------------------------------------|
| Likelihood   | 0.7542                   | 0.0016                       | 0.0723                                |

Download: [PNG](#) / [EPS](#) / [Tabular](#)

SignalP-5.0 prediction (Gram-positive): VEU54887.1

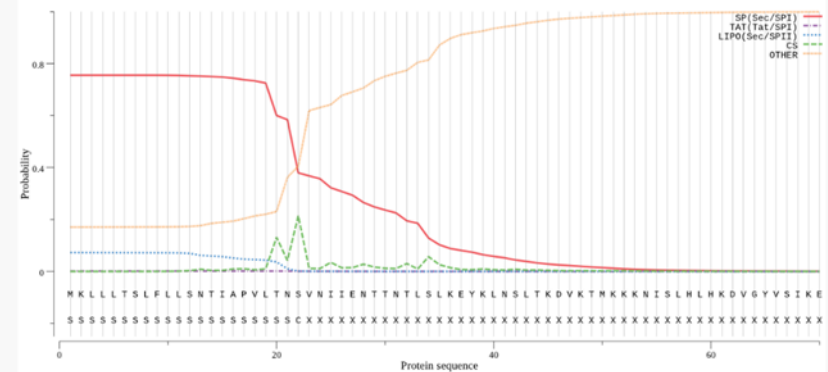

**Ruminococcus flavefaciens**

lipoprotein [Ruminococcus flavefaciens]

Sequence ID: [WP\\_009982655.1](#) Length: 810 Number of Matches: 1

Range 1: 434 to 575 [GenPeptGraphics](#) [Next Match](#) [Previous Match](#)

Alignment statistics for match #1

| Score                                   | Expect | Method               | Identities   | Positives    |
|-----------------------------------------|--------|----------------------|--------------|--------------|
| 70.9 bits (172)<br>adjust. 47/149 (32%) | 3e-11  | Compositional matrix | 71/149 (47%) | 30/149 (20%) |

|       |     |                                                             |           |
|-------|-----|-------------------------------------------------------------|-----------|
| Query | 29  | IKNIVLDVSNSSGGYLGTAFEIM-----GFLTDPFKSYSYN                   | 65        |
|       |     | IK +V DV+ N+GG + TA +M                                      | G +TD +++ |
| Sbjct | 434 | IKKLVFDVATNTGGNMMTAMYMMNLIKGLNSVSLKNTSVMAGDSEGLITDDFKTDRNFD | 493       |
| Query | 66  | PLTKEQKVETIKSRFKKYDFNYVLTSPFSFSAGNIFPQLVKDNNVAKVIGFKTAGGASA | 125       |
|       |     | + E K K+D Y V+TS SFS GN FP L KDNN+ VIG ++ GG+ A             |           |
| Sbjct | 494 | KVIDE-----KDDAIKFDLQYGVITSKMSFSCGNWFPSLCKDNNIV-VIGERSGGGSCA | 546       |
| Query | 126 | ISQAILPTGDIIQLSSNNVLTNKSHQSLE                               | 154       |
|       |     | + ++LP G I S+ L + +S++                                      |           |
| Sbjct | 547 | VDLSVLPDGMIIYSYSTGITLVDSKGESID                              | 575       |

>WP\_009982655.1 lipoprotein [Ruminococcus flavefaciens]  
 MNFKKTIAGISALSMLLSTSAVSAVNFAADDETTNYTDKTIINAYLYSNDNVDTMTARFYNDKPNIPYLR  
 ISEFYKKWLDQDLEITNKNDGTYDVKVPFGTVGTDFDVEKDTIHSDDVGKFFIPEDDANSTSAASDLFIRE  
 EEAEKAVDVTDFDGAYNIDFLGDENDIWLPAPTLCLDFAGTDKQSLYLDGSMYFCGYLLSDYSRSLIPQ  
 TQEHITNLIEDFKDGRPADLIKYNIDEFCFLMDSGYGYPGRIPFNDIMKEKGFDMLEEGNETTKKIKEL  
 LNSTDLYEYCAGLELLNGYFFDGGHTSFLPIPYTYDANFEILDGEFAAKVDAVIEGLGELKDNVDLKLEE  
 KNLEASIIIGVENARKAMAETADYTEELSSSVYIEKGDVAVLMFDTFVIDLDSWDGYYHNGAELPEDEVTD  
 FYKAVQKADSNPAIKKLVFDVATNTGGNMMTAMYMMNLIKGLNSVSLKNTSVMAGDSEGLITDDFKTDR  
 NFDKVIDEKDDAIKFDLQYGVITSKMSFSCGNWFPSLCKDNNIVVIGERSGGGSCAVDLSVLPDGMIIYSY  
 STGITLVDSKGESIDLGIQPDYENVKIAEDGSKDFSETFNFDNISKIFDEFYGNTTTTTAAETTTTTTTT  
 TSATTSTTTSSSTNTSTDTTTTTTTTTAAKSTKSEETTTAAATTKAEDKT  
 IGTNDEITKMVEKDYFVKTKGNAASSETNVNKDGLTVELKDENGVIDKYTVDPETGKGTADAGNEVDL  
 PQTGINSLGTAGAAVGAVMLMLAGAAVHGSGLVLRKKEND

```
# WP_009982655.1 Length: 810
# WP_009982655.1 Number of predicted TMs: 1
# WP_009982655.1 Exp number of AAs in TMs: 31.41054
# WP_009982655.1 Exp number, first 60 AAs: 10.98539
# WP_009982655.1 Total prob of N-in: 0.48931
# WP_009982655.1 POSSIBLE N-term signal sequence
WP_009982655.1 TM#12.0 outside 1 781
WP_009982655.1 TM#12.0 TMhelix 782 804
WP_009982655.1 TM#12.0 inside 805 810
```

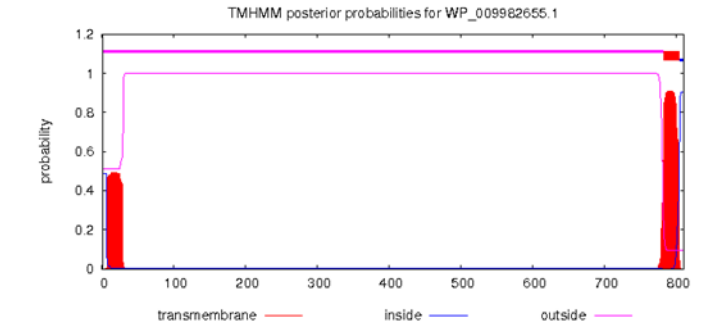

>RUFLA17\_v1\_2350006|ID:44521933| exported protein of unknown function [Ruminococcus flavefaciens 17] WP 028518726.1

MNIKKTLAGISALSWLISSGAFAMNAFAADAAEYRTGQITAHLYSEDNLRDIECRYND  
 MPNVPIKLSDYSCWTSQELQITNKNGTYEVTVPIGATGIIDVKNKDTVSSDDIGGFCY  
 PQYVIESNTSNLYTYVKSISKPNKESYTTDFSDYKIDLRGDDNDIWWPVATLCDFYDFN  
 LNQGALIDDNLYFFNSILDIKYSRTAIGNSAAHKEAFIEKYQNGRPKDMVEYNYNELCFN  
 FDRTYGFPGRFIYNDLLAETNFDTMLSTASDSTKKIKELLLSEDAHEYCAGYELLNRYFW  
 DGGHTFFYGTMISEESDFTAKVAEVFASISGLKDAMNYRAINANSEYSGNSAYTALIKMC  
 ETADTYEEFNNSIYAVKGD TAVFSFLMFNDESDKWSSYYYENGEMPQDLITEFYNCVTKA  
 NADPAIKNFVIDLGNFNGGSAAVLEYMMGIIISDLNITIIILGNGDKSVTEQYLVDKNLDK  
 SYDEKDKAMKLDLNFGIITSNYSF CANLMPALAKDAGIMLVGEKSGGGTCATNRYVTPD  
 GLVYALSTGQKQFVDKAGTPIIDNGIQPDYDVKINDDGTKDYSEVYNFSMLSSLFSDFYGK  
 KAETDPSVTTTTTTTTTTTTTTTTTTTTSSSSTTTSETTTVSSTSSSSASTSGNTTTTNANGT  
 LPKTGNNSAGTAAAAACAAVIT IAGGALIFISRRTRNKEDNGIS\*

LPKTG sorting signal

```
# RUFLA17_v1_2350006|ID:44521933| Length: 704
# RUFLA17_v1_2350006|ID:44521933| Number of predicted TMs: 2
# RUFLA17_v1_2350006|ID:44521933| Exp number of AAs in TMs: 42.64751
# RUFLA17_v1_2350006|ID:44521933| Exp number, first 60 AAs: 20.07843
# RUFLA17_v1_2350006|ID:44521933| Total prob of N-in: 0.90010
# RUFLA17_v1_2350006|ID:44521933| POSSIBLE N-term signal sequence
RUFLA17_v1_2350006|ID:44521933| TMHMM2.0      inside  1  6
RUFLA17_v1_2350006|ID:44521933| TMHMM2.0      T$helix  7  29
RUFLA17_v1_2350006|ID:44521933| TMHMM2.0      outside 30 668
RUFLA17_v1_2350006|ID:44521933| TMHMM2.0      T$helix 669 691
RUFLA17_v1_2350006|ID:44521933| TMHMM2.0      inside  692 704
```

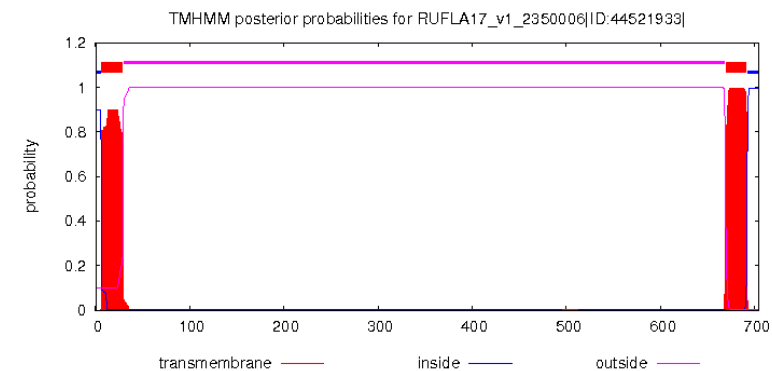

```

>WP_082325677.1 LPXTG cell wall anchor domain-containing protein
[Ruminococcus flavefaciens]
MGFRITYKRNKRFFQQRKMLCFLYLDPDKLSRRII//MNIKKTLAGISALSWLISSGAFTAMNFAADAAEYR
TGQITAHLYSEDNLRDIECRYNDMPNVPYIKLSDYYSWCWTSQELQITNKNGTYEVTVPIGATGIIDVN
KDTVSSDDIGGFCYPQYVIESNTSNLYTYVKSISKPNKESYTTDFSDYKIDLRGDDNDIWWPVATLCDF
YDFNLNQGALIDDNLYFFNSILDIKYSRTAIGNSAAHKEAFIEKYQNGRPKDMVEYNYNELCFNFDRTYG
FPGRFIYNDLLAETNFDTMLSTASDSTKKIKELLSEDAHEYCAGYELLNNYFWDGGHTFFYGTMISEES
DFTAKVAEVFASISGLKDAMNYRAINANSEYSGNSAYTALIKMCETADTYEEFNNSIYAVKGD TAVFSFL
MFNDESDKWSSYYYENGEMPQDLITEFYNCVTKANADPAIKNFVIDLGANFGGSAAVLEYMMGIISDLN
ITIIILGNGDKSVTEQYLVDKNLDKSYDEKDKAMKLDLNFGLIITSNYSFSCANLMPALAKDAGIMLVGEKS
GGGTCATNRYVTPDGLVYALSTGQKFVDKAGTPIDNGIQPDYDIVKINDDGT KDYSEVYNF SMLSSLFSD
FYGKKAETDPSVTTTTSTTTTTSTTTTTTTTTSSSSTTTSETTTVSSTSSSSASTSGNTTTTNANGTLPKLTGN
NSAGTAAAAACA AVIT IAGGALIFISRRTRNKEDNGIS

```

/// : alternative start (this study)

```

# WP_082325677.1 Length: 738
# WP_082325677.1 Number of predicted TMMs: 2
# WP_082325677.1 Exp number of AAs in TMMs: 44.57823
# WP_082325677.1 Exp number, first 60 AAs: 19.47697
# WP_082325677.1 Total prob of N-in: 0.98122
# WP_082325677.1 POSSIBLE N-term signal sequence
WP_082325677.1 TMM#12.0 inside 1 40
WP_082325677.1 TMM#12.0 THelix 41 63
WP_082325677.1 TMM#12.0 outside 64 702
WP_082325677.1 TMM#12.0 THelix 703 725
WP_082325677.1 TMM#12.0 inside 726 738

```

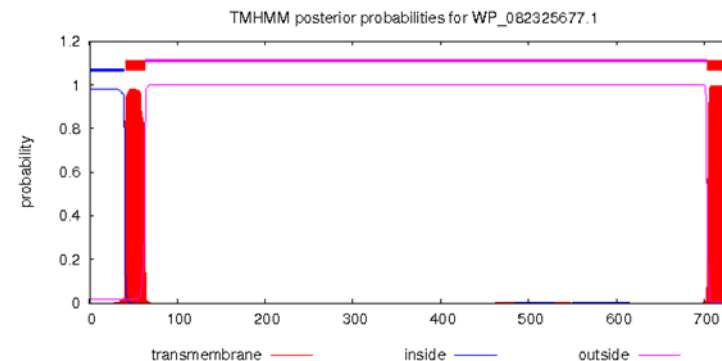

>WP\_080693401.1 LPXTG cell wall anchor domain-containing protein [Ruminococcus flavefaciens]

MIMNSKKT IAGLSALSVL I SSGAFTAMTAF AADTA EYTTGKMTAHLYSDEKLKEIECRYYNDMPNVPYIK  
LSDYYSCWLCQYPDQELAITNKNDGT YEVKMPIGATGIIDTNKDTVSTDDAAGFLYPQYIILESENGENIFT  
YVKGDS SAEDEDEKVS YTDQDFSVYDIDIRGDEKDIWWPATTLCDFYEYSLNQGAVIDDDLYFFPQILST  
YSRTALAGTPEHTAAFIEKYKNGRPKDMIEYNYNELCFCFDRNYGFPGRFKYNELLEENGFDKMLSTASD  
GTTKIKELLLSEDL YDYCAGYEMLNDYLWDGGHTVFTDFMLQNSKDLASAVSAKFQTIAMPEDAFDHYAV  
LNNSNNSGYTALKTREEMYKTADTYEKGNGSEYSVKGD TAFFAFNFFEDNAAGWYNYFFNNGELPQDVVS  
EFYNSIKKADADPAVKNFVIDLSTNGGGSLSIVQYMMGLINDLDNVTVMNGKTENAKFVIDKNL DKAYD  
DKDKAFKTDLRFGIITSNYSFSCANLMP SLAKDAGIMLIGERSGGGTCATNRYFTPDGLLYALSTGLKFV  
DKDGNTIDDGIVPDYDIVKKNADGTKDYSDVYNYSKLSALFDEFYGKKT DSSQSTSTTTTTTTTTTTTSAT  
TTTSATTTAASSTSTSSAASSTSGSTTTTTNVSTLPQTGNKSA A A A C A A V L V M A G G A F M L M S R K K E N

```
# WP_080693401.1 Length: 699
# WP_080693401.1 Number of predicted TMs: 2
# WP_080693401.1 Exp number of AAs in TMs: 36.02416
# WP_080693401.1 Exp number, first 60 AAs: 21.05507
# WP_080693401.1 Total prob of N-in: 0.94982
# WP_080693401.1 POSSIBLE N-term signal sequence
WP_080693401.1 TMHMM2.0      inside      1      8
WP_080693401.1 TMHMM2.0      TMhelix     9     31
WP_080693401.1 TMHMM2.0      outside     32    673
WP_080693401.1 TMHMM2.0      TMhelix    674    693
WP_080693401.1 TMHMM2.0      inside     694    699
```

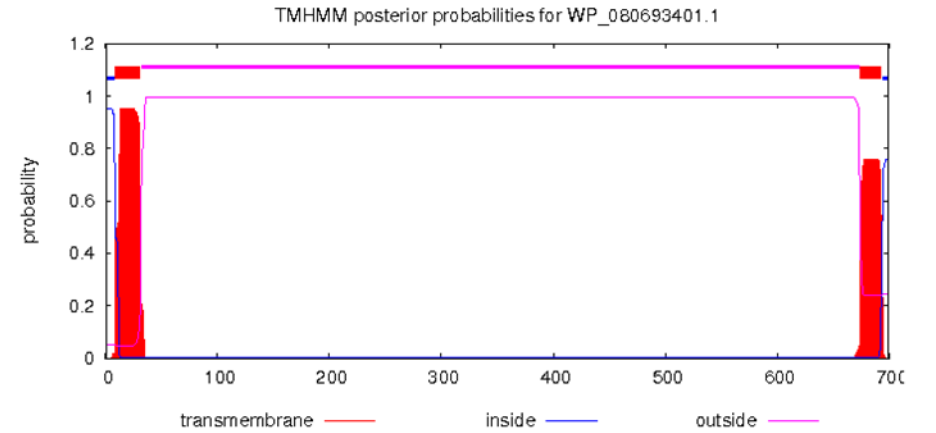



```

>WP_082320460.1 hypothetical protein [Ruminococcus flavefaciens]
MTSYQLYFEPQAVKLLSRRIT///MKIKKTIAGIAALSVIISGAFALTASAAETS DYTTSKMTAHVYSDEN
LIDIECRYYS DMPHVPIKLSDYSCWTGQELEINAKNDGIYEVKVPYGATGIIDINKEYMSSE DIEHFI
CPAYVFDSNDQSYETYTKENTESEEPQFGDIDLSEYKIDIRGDENEVWVPAATLCDIFEYPLNEGMCVEE
ELYFCGHVNSEYNRKDNALNPAHAAEYLEKYKDGRPKDMAEFNYNELCFEIDNIYGFPGRITYNDLLAEK
GFDGMLSEASDGTRKVKEMLLSEDPYEYCAGLELLNYYFWDGGHTFFNNLAAIGSKEQVEKVG EYLVSPD
ELEGAFIWADNAQASASGYLAQEARIAMFETADTYEAPPHPDDTLPYEYAVKGD TAFFSFSGFNANTP
AWLNYYYNNGELPKDLISDFYSCITRADKDP AIKNFVIDLGTNRGGS LDVLMYMMGLINDLDHINLASGS
NDEPQKSEFLVDKNLDKAFDEKDDAFKTDLNFGIITSNYSFSCANLMPSLAKDSGIMLIGERSGGGACST
DYHATADGMIYAMSYGIK FADKDGKSIDEGIEPDYALVKLNEDGSKDYS DVYNFANLSSLFADFYKKDAP
QEPSEPETETTTTTTTTTVTTTTTTTTT VSTTSDKDTTSSATSSASGSSSETTTTTT D ASDLPKKTGNNSMGT
AAAAACAFIMT LSGGAAMMAAYRLRRKDENGSL

```

/// : alternative start (this study)

```

# WP_082320460.1 Length: 733
# WP_082320460.1 Number of predicted TMHs: 2
# WP_082320460.1 Exp number of AAs in TMHs: 43.04645
# WP_082320460.1 Exp number, first 60 AAs: 21.65657
# WP_082320460.1 Total prob of N-in: 0.96450
# WP_082320460.1 POSSIBLE N-term signal sequence
WP_082320460.1 TMHMM2.0 inside 1 27
WP_082320460.1 TMHMM2.0 TMhelix 28 50
WP_082320460.1 TMHMM2.0 outside 51 699
WP_082320460.1 TMHMM2.0 TMhelix 700 722
WP_082320460.1 TMHMM2.0 inside 723 733

```

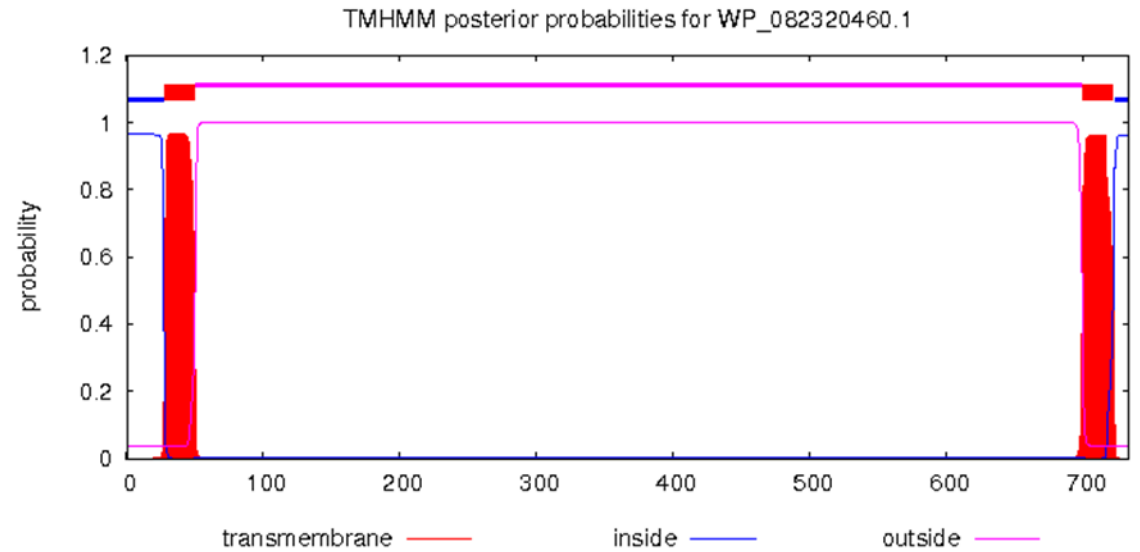

Supplement: AEM.01439-19-s0001.pdf [file AEM.01439-19-s0001.pdf]
